# Supplementary material for: Activation of the Anaphase Promoting Complex Reverses Multiple Drug Resistant Cancer in a Canine Model of Multiple Drug Resistant Lymphoma
Source: MDPI journal article supplement (doi:10.3390/cancers14174215), 2022-08-30
Supplement: s1 [file s1]

A

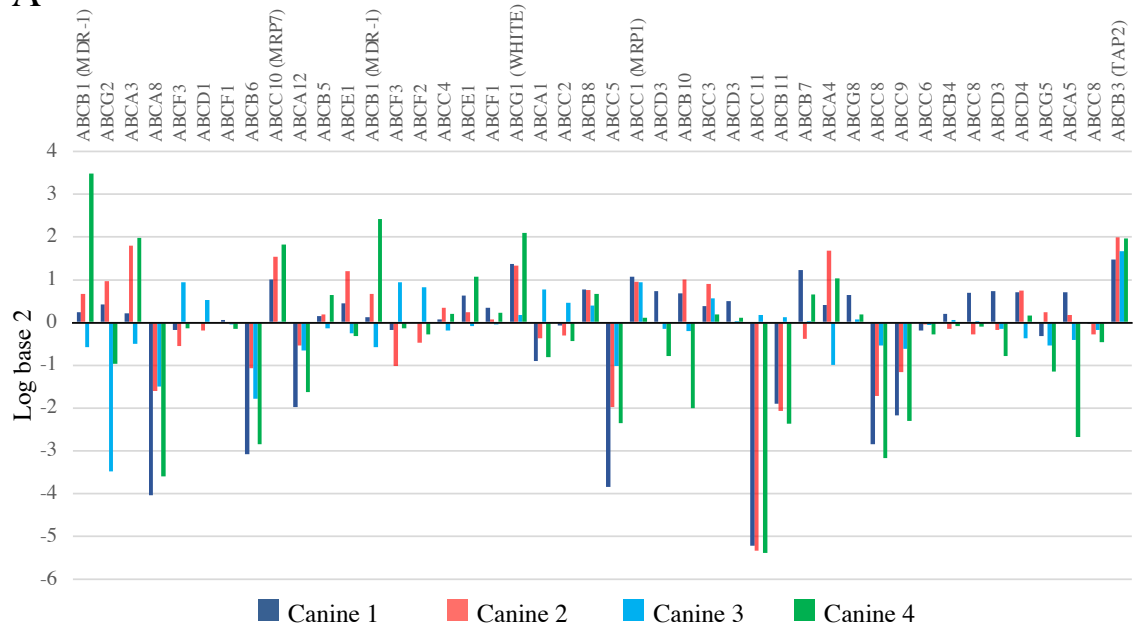

B

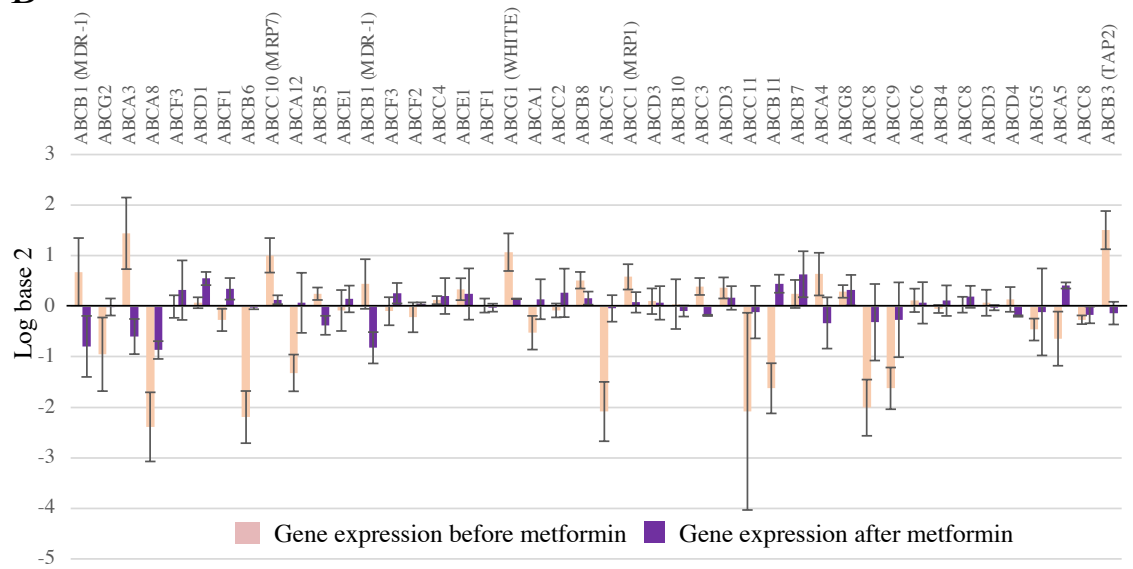

**Supplemental Figure S1. ABC transporters in general do not appear to play a critical role in the development of canine MDR lymphoma.** **A.** Differential gene expression of the family of ABC transporters on the canine microarray was determined for each MDR canine sample. **B.** ABC transporter gene expression changes were averaged for the 2 canines (2 and 4) that were treated with metformin and analyzed by microarray. The light purple bars represent MDR tumor before metformin compared to controls. The bars in dark purple represent MDR tumors after metformin treatment compared with before treatment. The SEM was plotted.

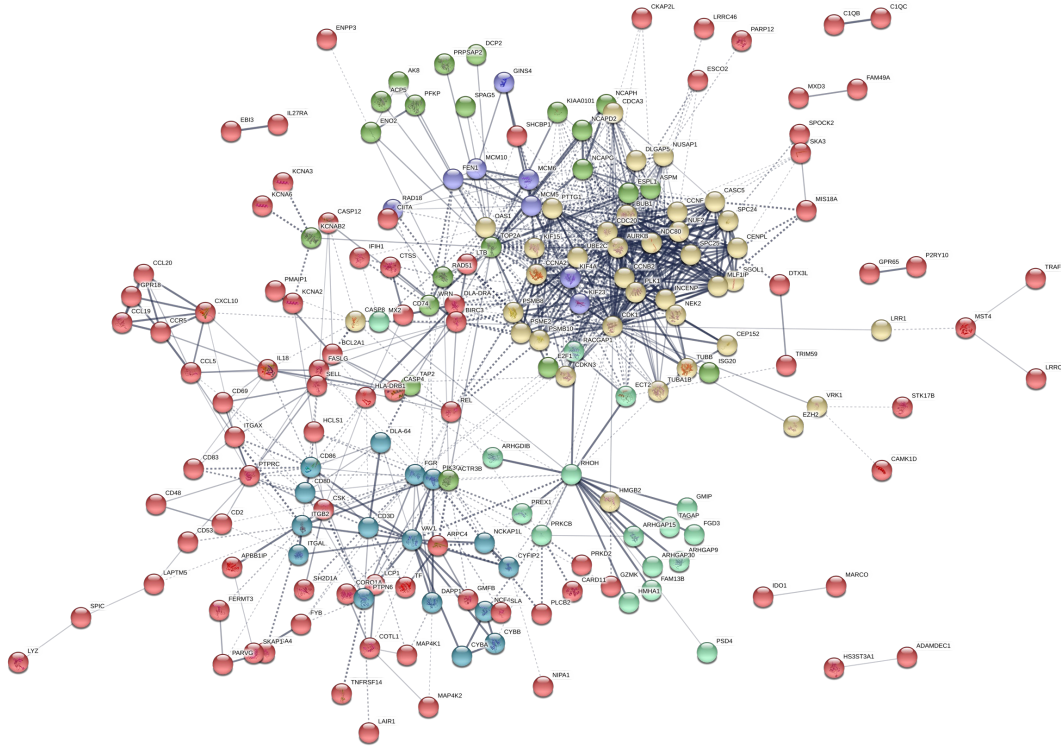

**Supplemental Figure S2. 186 genes form the 290 gene set are predicted to form a highly interconnected network based on STRING.** STRING analysis of the 290 common overexpressed genes within the tumors of MDR canines (Fig. 2A) reveals a highly interconnected 186 gene set. A thicker connecting edge indicates higher confidence in the predicted interaction. The genes were grouped into 6 clusters, as shown by the different colored nodes. The yellow nodes are highly clustered and largely define genes involved in mitotic progression (see Supplemental Table S4). The green and purple nodes, also tightly connected to the yellow nodes, are primarily involved in chromosome maintenance and DNA repair. A significant number of these genes encode proteins known to be targeted by the Anaphase Promoting Complex (marked by an \* in Supplemental Table S4). The majority of these genes are elevated in a variety of human cancer types.

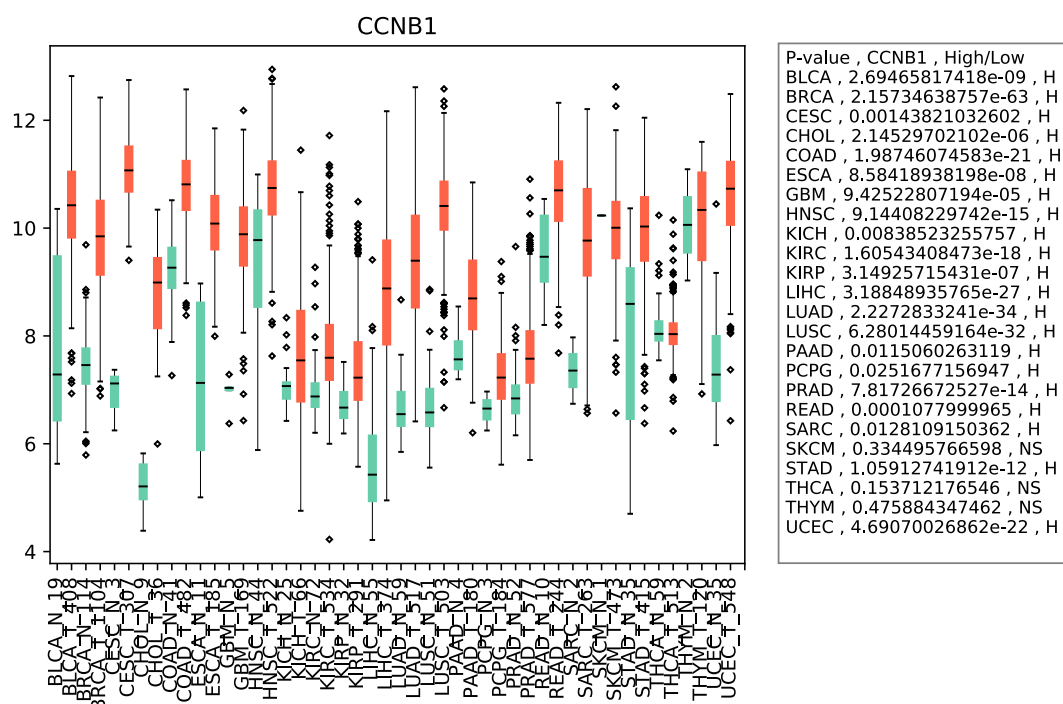

**Supplemental Figure S3. Expression scores for CCNB1 within 24 different types of cancer and normal tissue.** Using the Cancer Genome Atlas (TCGA) (<https://portal.gdc.cancer.gov/>) database, we determined if expression of an APC substrate gene (CCNB1) in cancer patients is differentially regulated between normal and the tumor tissues. The numbers along the x-axis denote the number of patient samples in each cancer type. Statistical significance of the difference in expression between the normal and tumor samples are depicted for each cancer type. NS denotes not significant. The abbreviation of each cancer along the y-axis is represented as described in the TCGA portal.

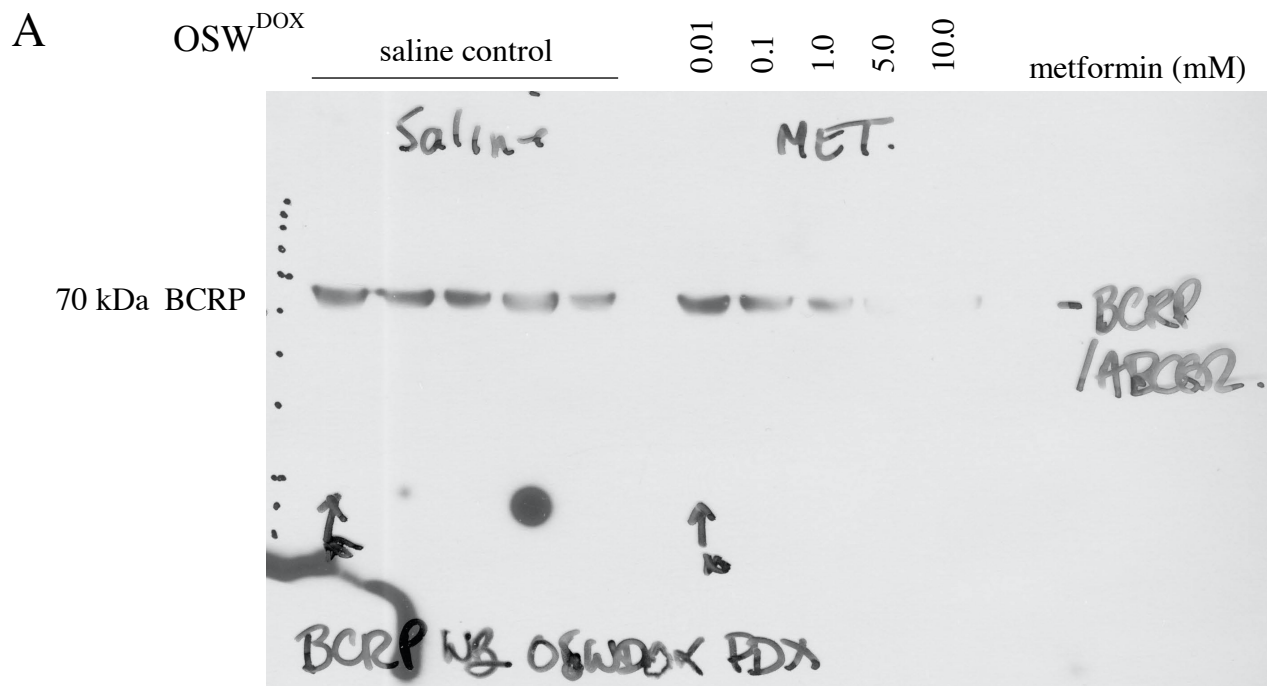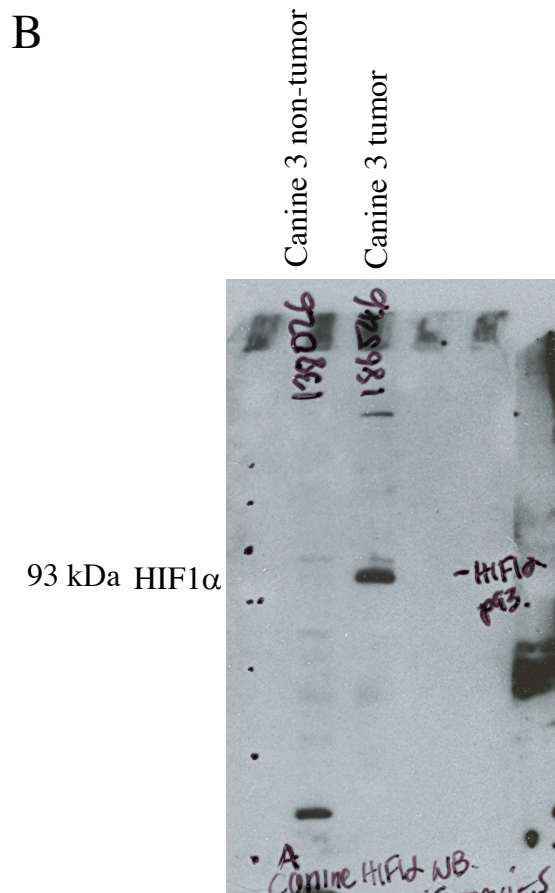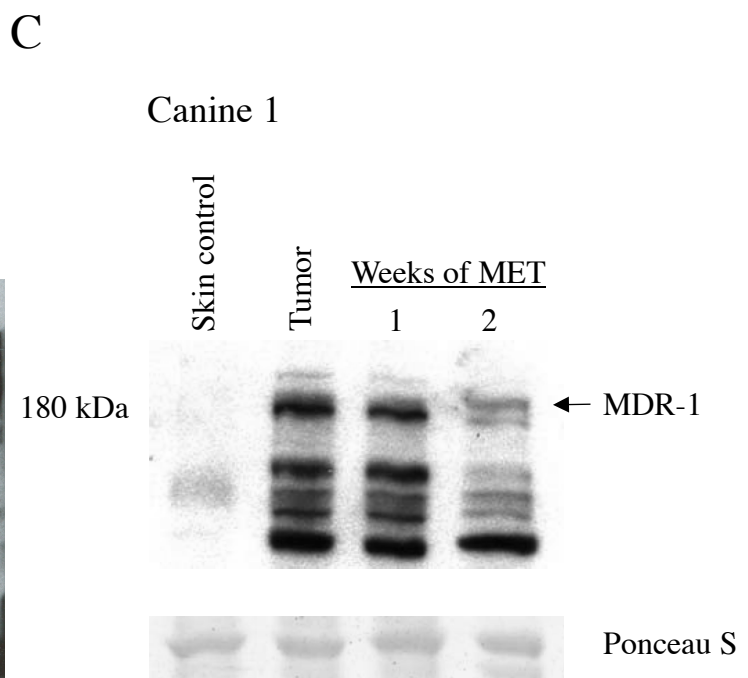

C

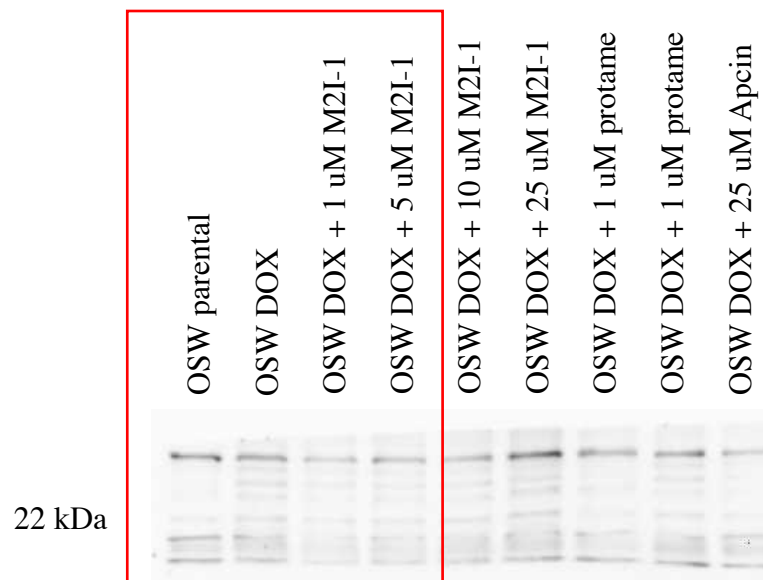

B

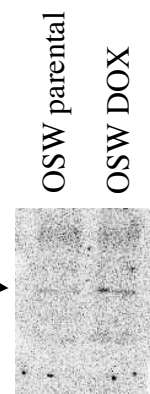

D

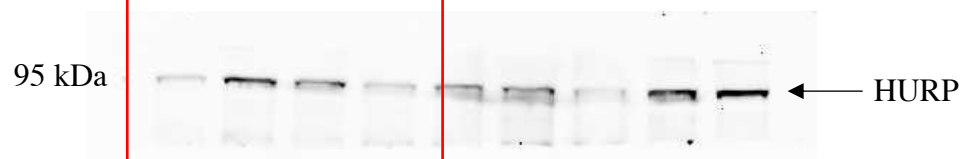

E

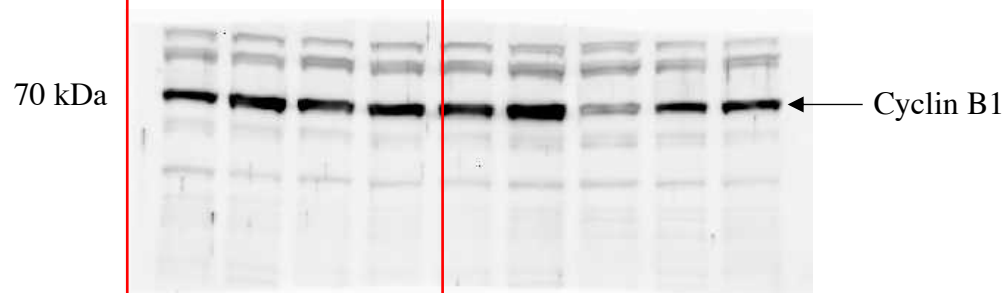

F

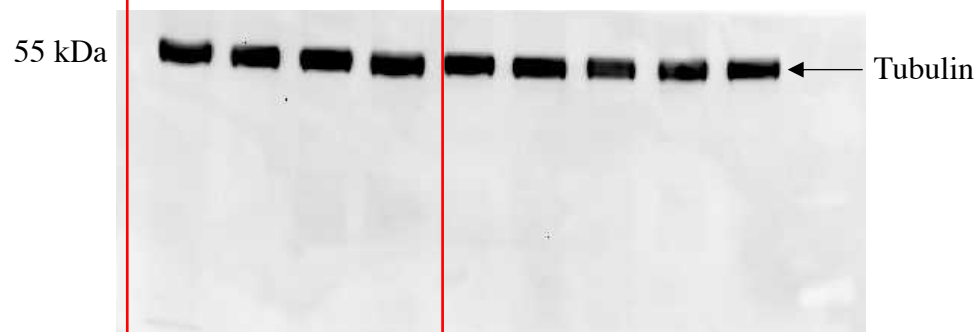

**Supplemental Figure S4. Original blots.** These are representative blots showing the full range of bands observed using the different antibodies assessed in this study. **A.** A complete western blot showing BCRP protein bands. See Figures 1C and 5A. **B.** A complete western blot showing signal using HIF1 $\alpha$  antibodies. See Figures 1C and 5A. **C.** A complete blot showing signal for antibodies against MDR-1. See Figures 1 and 5A. **D.** and **E.** Typical Securin western blot results. A band at 22 kDa was imaged for Securin. See Figures 5C and 5E. **F.** A blot showing the bands observed using antibodies against HURP. See Figures 5C and 5E. **G.** A western blot showing the results of using antibodies against Cyclin B1. See Figure 5C. **H.** Western blot showing results using antibodies against Tubulin. See Figures 1B, 1C, 5C and 5E.

**Supplemental Table S1. Lists of genes upregulated >3 fold in the 4 MDR canines.** All genes differentially expressed >3 fold for the tumor samples, compared to control skin samples, were retrieved from the microarrays. Venn analyses identified a common set of 290 genes overexpressed in all 4 MDR canines. STRING analyses identified a set of 186 genes within the 290 gene set that were highly connected.

**Supplemental Table S2. Cytoscape node list for the 146 gene set (see Fig. 2B).** The 290 gene set was analyzed using the Cytoscape online tool. 13 interconnected nodes, composed of 146 genes, were identified that defined pathways involved in DNA repair and cell cycle progression through mitosis.

**Supplemental Table S3. Cytoscape network pathway enrichment for 146 gene set (see Fig. 2B).** Network, Biological and Cell Component pathways were identified from the 146 gene network indicating the number of total genes in the complete gene set and the number found in our network. The enrichment was indicated by the p-value.

**Supplemental Table S4. Gene clustering from the STRING analysis identifies a set of genes within the 186 gene set that defines progression through mitosis as a key regulator of MDR development.** The clusters identified in Supplemental Fig. S2 were listed and categorized in terms of function based on review of the literature. Genes highlighted in yellow define genes involved in mitotic progression, while genes highlighted in green define genes involved in DNA replication and repair. \* denotes APC substrates; \*\* denotes kinetochore and Spindle Assembly Checkpoint associated proteins; \*\*\* denotes components of the chromosome condensin complex.



**Supplemental Table S5. Analyses of genes identified as responsive to clinical chemoresistance, remission, and relapse in canine 4.** A table comparing genes overexpressed >3 fold in the chemoresistant tumor, down-regulated >2 fold upon remission, and >3 fold following relapse in canine 4, identified 27 genes in common. STRING interactions were identified for each comparison. As above, genes highlighted in yellow define genes involved in mitotic progression, while genes highlighted in green define genes involved in DNA replication and repair. \* denotes APC substrates; \*\* denotes kinetochore and Spindle Assembly Checkpoint associated proteins; \*\*\* denotes components of the chromosome condensin complex.

**Supplemental Table S1: Genes upregulated in the 4 canines over 3 fold revealed a common 290 gene set.**

| Canine 2-Tumor vs Control-875 genes | Canine 4-Tumor vs control-1254 genes | Canine 1-Tumor vs control-1276 genes | Canine 3-Tumor vs control-1365 genes | Venn 290 common gene set | STRING 186 common |
|-------------------------------------|--------------------------------------|--------------------------------------|--------------------------------------|--------------------------|-------------------|
| CXCL13                              | CD52                                 | AK8                                  | LOC612122                            | PFKP                     | PFKP              |
| TF                                  | DNAH8                                | AK8                                  | IGHAC                                | NCF4                     | NCF4              |
| MARCO                               | LOC607937                            | CXCL13                               | BEX5                                 | HS3ST3A1                 | HS3ST3A1          |
| CCL19                               | IL7R                                 | LOC478056                            | PCDHA5                               | KCNA6                    | KCNA6             |
| LOC612122                           | GZMK                                 | NCF4                                 | SAMSN1                               | MLF1IP                   | MLF1IP            |
| LOC612180                           | LOC612122                            | IGHAC                                | TF                                   | FGR                      | FGR               |
| CD5L                                | CD8A                                 | BEX5                                 | SELL                                 | SEMA4D                   | PRKCB             |
| DNASE1L3                            | LOC488683                            | SELL                                 | LOC102155211                         | C20H19orf66              | SELL              |
| APOC1                               | GGT1                                 | LOC612180                            | CCL19                                | PRKCB                    | CCL19             |
| SFRP2                               | LOC612180                            | LOC102155211                         | ISG20                                | SELL                     | LAIR1             |
| LOC607937                           | ZNF683                               | CXCL13                               | CASP12                               | CPLX3                    | LRRC8D            |
| CCL20                               | GPR171                               | PCP4L1                               | LOC612180                            | CCL19                    | CDK1              |
| WFDC2                               | FYB                                  | FYB                                  | ITGB2                                | DLA-DMB                  | TUBB              |
| TNFSF11                             | CD40LG                               | LOC612122                            | CASP12                               | LAIR1                    | RACGAP1           |
| CD86                                | SH2D1A                               | CD52                                 | CXCL10                               | LRRC8D                   | TF                |
| TF                                  | TNFSF8                               | LOC100855883                         | HAAO                                 | CDK1                     | FYB               |
| CXCL10                              | CD226                                | CPLX3                                | DLA-DOB                              | TUBB                     | RAD18             |
| POSTN                               | GIMAP7                               | LOC607937                            | AK8                                  | RARRES3                  | RHOH              |
| GZMK                                | CD96                                 | PHEX                                 | SFRP2                                | RACGAP1                  | FERMT3            |
| MPO                                 | IL12RB2                              | SCML2                                | TNFSF8                               | DUSP5                    | DAPP1             |
| PCDHA5                              | TRAT1                                | TRAF3IP3                             | OASL                                 | TF                       | CD53              |
| CAMP                                | CD3E                                 | GIMAP2                               | CYBB                                 | FYB                      | CIITA             |
| LOC100686390                        | CD80                                 | MIS18A                               | TRAF3IP3                             | RAD18                    | GMFB              |
| C1QC                                | LEF1                                 | SH2D1A                               | CD5L                                 | RHOH                     | ARHGAP15          |
| SH2D1A                              | SLAMF1                               | RBM44                                | PMAIP1                               | IKZF3                    | IL27RA            |
| CD52                                | SYTL3                                | LOC612553                            | LOC608687                            | FERMT3                   | TAGAP             |
| KMO                                 | CCL19                                | BUB1B                                | ELL3                                 | DAPP1                    | AURKB             |
| CR2                                 | CD28                                 | KMO                                  | CASP4                                | CD53                     | OAS1              |
| RGS10                               | LCK                                  | CYBB                                 | PLEKHA2                              | CIITA                    | SLA               |
| POSTN                               | CASP12                               | SLC38A11                             | CD69                                 | LYSMD2                   | CENPL             |

|              |           |              |              |           |         |
|--------------|-----------|--------------|--------------|-----------|---------|
| LOC612553    | CD160     | CDCA3        | ADAMDEC1     | GMFB      | KIF4A   |
| LAIR1        | LCK       | GPR65        | LOC100856041 | ARHGAP15  | LRR1    |
| IDO1         | GFI1      | KIAA0101     | RBM11        | IL27RA    | ENO2    |
| CD80         | CASP12    | ELL3         | PTCHD2       | GFI1      | FAM49A  |
| TIMD4        | CD27      | CCNB2        | HLA-DRB1     | FAIM3     | CD2     |
| AMICA1       | CCL5      | DNTT         | LRRC46       | TAGAP     | MCM10   |
| CD69         | IGHAC     | TNFSF8       | DLA-DQB1     | AURKB     | CD83    |
| CCL5         | CD8B      | MX2          | CIART        | TFEC      | IL18    |
| ASPM         | ICOS      | AGER         | FXYD2        | DLA88     | MCM5    |
| PTTG1        | CTSW      | RHOH         | CD1A8        | OAS1      | ITGB2   |
| VCAM1        | ADAMDEC1  | LRRC46       | CCR6         | SLA       | PSMB8   |
| TFPI2        | AMICA1    | PLEKHA2      | CYBB         | CENPL     | PIK3CD  |
| CBD139       | GIMAP2    | PTTG1        | LIMD2        | ND6       | NDC80   |
| SNAP91       | RGS1      | RBM11        | NDC80        | KIF4A     | GPR18   |
| CD2          | IDO1      | GPR15        | THEMIS2      | LIMD2     | CCNA2   |
| LOC100685470 | CLIC6     | LOC100856041 | WFDC2        | LRR1      | SPIC    |
| TNFSF8       | LOC608687 | RACGAP1      | LOC100685195 | ENO2      | NUF2    |
| IL18         | CD69      | RARRES3      | MIS18A       | RAB11FIP4 | CD86    |
| ND6          | PSTPIP1   | CD69         | LY86         | FAM49A    | PTTG1   |
| CCNB2        | AMICA1    | PSPH         | CORO1A       | CD2       | BCL2A1  |
| CLEC12A      | ND6       | ESPL1        | KMO          | MCM10     | ECT2    |
| NCAPG        | CD6       | LY86         | HAVCR1       | CD83      | KIF23   |
| MILR1        | IL2       | MLF1IP       | HSH2D        | IL18      | PTPRC   |
| RBP5         | CD80      | BUB1         | OAS1         | SMCO4     | ARHGDIB |
| CCL4         | CTLA4     | CCL19        | DLA-DQB1     | TRAIP     | PARVG   |
| SLC38A11     | BEX5      | SHCBP1       | LOC606863    | LOC607281 | IDO1    |
| CCL2         | CD2       | MX1          | DNASE1L3     | MCM5      | EBI3    |
| LOC608687    | CCR5      | BLK          | CSPG5        | ITGB2     | SPAG5   |
| AMICA1       | MARCO     | GCA          | CR2          | GDPGP1    | ACTR3B  |
| EBI3         | GRIP2     | LOC100685470 | BLK          | PSMB8     | PARP12  |
| CORO1A       | ISG20     | ZG16B        | EFCAB3       | ABRACL    | HMHA1   |
| FABP2        | TAGAP     | ASPM         | USP18        | PIK3CD    | ACP5    |
| LIMD2        | LOC612106 | CDKN3        | DLA-DQA1     | NDC80     | AK8     |

|           |              |           |              |             |          |
|-----------|--------------|-----------|--------------|-------------|----------|
| SLC14A1   | GIMAP8       | HHAT      | CCL20        | GPR18       | TAP2     |
| CDK1      | GIMAP4       | KIAA0226L | RHOH         | CCNA2       | PRKD2    |
| IFI6      | GBP1         | CCL17     | LOC611500    | LOC481744   | CCNB2    |
| BUB1B     | LOC488248    | NCAPG     | FGR          | SPIC        | KCNA3    |
| CD53      | DNASE1L3     | RAB11FIP4 | PADI4        | DLA-DOB     | PSD4     |
| FYB       | ZAP70        | CDC20     | FAM118A      | NUF2        | CD74     |
| IL18BP    | RUNX2        | RAB11FIP4 | NCF2         | THEMIS2     | NCKAP1L  |
| LAPTM5    | BST2         | MYBL2     | KIAA0101     | CD86        | CYBB     |
| NCF4      | SIT1         | KIF23     | LOC100685470 | PTTG1       | PMAIP1   |
| FUT8      | LOC611813    | CBD139    | ACP5         | STMN1       | ARPC4    |
| VWA5A     | CCL4         | DLA-DOB   | CD19         | BCL2A1      | TNFRSF14 |
| NDC80     | RGS10        | DLGAP5    | MX2          | EBP         | P2RY10   |
| CYBB      | DOK2         | EXO1      | PLCG2        | PARP8       | PTPN6    |
| ADORA3    | RARRES3      | C4BPA     | BIRC3        | ECT2        | ITGAX    |
| TRAF3IP3  | PREX1        | BANK1     | GIMAP2       | FMNL1       | DLGAP5   |
| TTK       | LAPTM5       | BANK1     | PTPN6        | KIF23       | ESCO2    |
| BFSF2     | SLA          | SKA3      | CIITA        | PTPRC       | CXCL10   |
| HS3ST3A1  | EMB          | UBE2C     | HHAT         | ARHGDIB     | CKAP2L   |
| RARRES1   | FAM65B       | NCAPH     | IFIH1        | PARVG       | CCL5     |
| BEX5      | KCNA6        | DEPDC1B   | MMP9         | IDO1        | PRPSAP2  |
| LOC490399 | SCML4        | PMM2      | GZMK         | EBI3        | MAP4K2   |
| CD80      | RHOH         | BATF      | LRMP         | C27H12orf35 | TRAF3IP3 |
| FASLG     | TRAF3IP3     | GIMAP4    | AK8          | SPAG5       | LYZ      |
| GPR171    | DLA-DOB      | HSH2D     | CD86         | ACTR3B      | LCPI     |
| SLAMF1    | CLEC9A       | HAVCR1    | TF           | PCDHA5      | FGD3     |
| LRMP      | RUNX2        | ARHGAP11A | DLA-DMB      | PARP12      | CCNF     |
| CASC5     | GBP1         | EAF2      | OAZ3         | HMHA1       | LRRC46   |
| CD180     | PIK3CD       | IL7R      | PHEX         | ACP5        | IFIH1    |
| CCL17     | EMR2         | NDC80     | BIN2         | TRIM34      | DLA-64   |
| ELOVL2    | KCNA3        | GFI1      | ATP6V0D2     | AK8         | PREX1    |
| CDKN3     | SLA2         | CDC45     | HTR1D        | TAP2        | MARCO    |
| ESPL1     | GCNT4        | LOC475113 | C20H19orf66  | PRKD2       | PSME2    |
| CDCA3     | LOC100685470 | AURKB     | LOC610699    | CCNB2       | CASP4    |

|           |              |           |           |           |          |
|-----------|--------------|-----------|-----------|-----------|----------|
| CCNB3     | CD53         | PTPRJ     | HS3ST3A1  | GIMAP4    | KIAA0101 |
| CD82      | INPP4B       | SLC9B1    | CD72      | KCNA3     | FAM13B   |
| SERPINE2  | ICOS         | TTK       | PIK3CD    | GBP1      | CYFIP2   |
| ALOX15    | CXCR4        | PLK4      | CD74      | PSD4      | ENPP3    |
| SPAG5     | KCNA2        | CXCL10    | NCF1      | BIN2      | NEK2     |
| NUF2      | BIN2         | SPC24     | ESCO2     | CD74      | ITGAL    |
| GPR65     | LOC490356    | PRKCB     | ZMAT1     | LOC612180 | SPC24    |
| BTK       | DTHD1        | CD1A8     | PFKL      | TNFSF8    | ESPL1    |
| UBE2C     | IL18RAP      | FABP2     | CPLX3     | NCKAP1L   | CYBA     |
| IFGGB1    | DENND2D      | CASC5     | CTSZ      | SWSAP1    | CIQC     |
| CD33      | LCP2         | CCNB3     | WDFY4     | CYBB      | PLCB2    |
| OASL      | DLA-DQB1     | ECT2      | RPS6KA1   | PMAIP1    | SH2D1A   |
| DLA-DQB1  | TXNDC5       | CCL20     | LOC490917 | LRMP      | ARHGAP30 |
| CIQB      | CAMP         | HAAO      | LOC607055 | ARPC4     | ADAMDEC1 |
| NEUROD6   | PMAIP1       | KAZALD1   | PARP9     | TNFRSF14  | CARD11   |
| POLE2     | LOC490595    | MIS18A    | RARRES2   | P2RY10    | PLK1     |
| ADAMDEC1  | CFP          | NCF2      | IFGGB1    | PTPN6     | MIS18A   |
| DLA-DQB1  | CD86         | DEPDC1    | DERL3     | WFDC2     | KCNA2    |
| CPLX3     | DLA-DQB1     | LOC608687 | FAM122B   | ITGAX     | EZH2     |
| TOP2A     | GPR65        | MSANTD3   | CD79B     | DLA-DQB1  | DTX3L    |
| RAB11FIP4 | CXCR3        | NEK2      | DNASE2    | DLGAP5    | E2F1     |
| LOC611500 | CMA1         | BST2      | CLEC12A   | PLEKHA2   | CASP8    |
| CTSG      | IGJ          | POLR3F    | MELK      | ESCO2     | GZMK     |
| ENPP3     | LOC609038    | NUSAP1    | PTPN22    | CXCL10    | TUBA1B   |
| LOC490356 | CARHSP1      | MCM10     | TLR1      | CKAP2L    | MAP4K1   |
| CCL8      | CYTIP        | CCNA2     | PTTG1     | CCL5      | CSK      |
| SKA3      | IFGGB1       | SLC51B    | SLC5A3    | PRPSAP2   | CTSS     |
| DLGAP5    | CASP3        | UNC119    | MYBL2     | MAP4K2    | SGOL1    |
| KIF23     | CRTAM        | SAP25     | BCL11A    | TRAF3IP3  | GMIP     |
| NUSAP1    | CASP4        | HELLS     | DLA-DRA   | LYZ       | LTB      |
| LOC448801 | LOC606863    | TOP2A     | PARP14    | LCP1      | CCL20    |
| KIAA0101  | LOC100684769 | CHEK1     | AIFM3     | FGD3      | CDC20    |
| FHIT      | CXCL10       | LOC476070 | PRKCB     | CCNF      | CD3D     |

|           |              |           |           |          |         |
|-----------|--------------|-----------|-----------|----------|---------|
| A2M       | PRKCB        | NCAPG2    | LTB       | LRRC46   | BUB1    |
| NTS       | SELL         | MCM5      | CASC5     | IFIH1    | HMGB2   |
| CD72      | BCL11B       | POC1A     | ARHGAP30  | DLA-64   | MX2     |
| RAB11FIP4 | FBXO5        | ORC6      | AURKB     | PREX1    | ITGA4   |
| NEUROD6   | CD7          | MCCD1     | FGD2      | MARCO    | SKA3    |
| PHEX      | BPIFB1       | ATAD5     | ARHGAP11A | ST3GAL5  | NCAPH   |
| CD1E      | CTSG         | CD180     | LYSMD2    | SDF2L1   | FASLG   |
| BCL2A1    | RTN4RL1      | GIN54     | ARHGD1B   | PSME2    | GPR65   |
| KNSTRN    | LOC100856041 | GPR171    | IGSF9     | CASP4    | SHCBP1  |
| CDC20     | SEMA4A       | RAD51     | C6        | KIAA0101 | COTL1   |
| LTB       | REG3A        | GBP1      | SEMA4D    | FABP2    | SKAP1   |
| TNFRSF14  | EFHC2        | SPC25     | GRK6      | FAM13B   | ASPM    |
| BATF      | ALDOC        | KIF4A     | LOC488248 | CYFIP2   | ARHGAP9 |
| TRIM22    | HLA-DRB1     | DNASE1L3  | COTL1     | LPCAT1   | CDCA3   |
| TLR8      | TMEM127      | APOC1     | UBE2C     | ENPP3    | DLA-DRA |
| TLR1      | CST7         | CENPI     | EPSTI1    | NEK2     | CD80    |
| CD19      | CXCR4        | IDO1      | FGR       | ITGAL    | UBE2C   |
| GFI1      | CMTM7        | OAS1      | CMTM7     | SPC24    | KCNAB2  |
| SAMSN1    | SLC9A3R1     | LOC611500 | FCRL1     | DERL3    | GIN54   |
| MYBL2     | SH2D2A       | ORC1      | FAIM3     | ESPL1    | CASC5   |
| BUB1      | CABP5        | ITGB2     | KIAA0226L | PTPRCAP  | SPOCK2  |
| CASP12    | LOC484314    | SKA3      | KYNU      | CYBA     | CORO1A  |
| GIMAP2    | CCND3        | TLR1      | ARL5C     | C1QC     | TOP2A   |
| SPIC      | PTGDR        | PTPN22    | LAPTM5    | PLCB2    | FEN1    |
| ARL4C     | ST8SIA4      | CDK1      | GIMAP4    | SH2D1A   | NCAPD2  |
| GPR18     | CD33         | IFIH1     | RASGRP1   | TRIM22   | DCP2    |
| TMEM176B  | LRRC46       | CR2       | NCAPG     | CD33     | ISG20   |
| CD40      | FGD3         | DAPP1     | STMN1     | DLA-DQA1 | SPC25   |
| PLK1      | RASSF5       | SPAG5     | CD180     | ARHGAP30 | MXD3    |
| CCR5      | PTPN22       | SNX10     | CD83      | ADAMDEC1 | C1QB    |
| TMEM150B  | cOR52H7      | ISG20     | CD74      | CARD11   | KIF15   |
| SHCBP1    | TRIM34       | SELP      | TBC1D10C  | PLK1     | CAMK1D  |
| CDH11     | LOC100856122 | GPR18     | BUB1      | IFGGB1   | WRN     |

|           |              |           |           |              |          |
|-----------|--------------|-----------|-----------|--------------|----------|
| APOE      | RAB11FIP4    | CENPK     | BUB1B     | MIS18A       | CD48     |
| OPRK1     | CIITA        | NUF2      | DNAH10    | IKZF1        | NIPA1    |
| AOAH      | IPCEF1       | AOAH      | DLA-DOA   | KCNA2        | REL      |
| NEIL3     | CCR7         | HTR1D     | TNFSF11   | DOCK8        | MST4     |
| AK8       | COTL1        | RGS10     | DOCK8     | EZH2         | HLA-DRB1 |
| PLK4      | DLA-DQA1     | SGOL1     | IFI44L    | DNASE1L3     | RAD51    |
| RHOH      | IFIT3        | BIRC3     | ESPL1     | DTX3L        | LAPTM5   |
| IL18BP    | BCL2A1       | CASP8     | CD2       | GMCL1        | MCM6     |
| TLR7      | ZFP36L2      | OASL      | SNAP91    | KNSTRN       | CCR5     |
| SLPI      | CCL20        | LRMP      | CYBA      | E2F1         | CEP152   |
| HSH2D     | LOC100683878 | FANCM     | CBD139    | CASP8        | CD69     |
| SELL      | PDE3B        | CORO1A    | BCL2A1    | PLXNC1       | TRIM59   |
| TREML1    | HMHA1        | CYBA      | ACTR3B    | SNX10        | APBB1IP  |
| KPNA2     | SKAP1        | LOC475176 | VAV1      | GZMK         | PSMB10   |
| SEMA4A    | PRKD2        | TENM3     | METTL4    | TRIM37       | CDKN3    |
| CACNB4    | ITGB2        | GINS2     | PPP1R3E   | TUBA1B       | CASP12   |
| ISG15     | RAB19        | ENO2      | NUSAP1    | LOC100685470 | NCAPG    |
| IL7R      | ABCB1        | PFKL      | TMEM130   | MAP4K1       | STK17B   |
| TFEC      | LOC611500    | LOC606863 | FASLG     | CSK          | VRK1     |
| KIF4A     | RAB27A       | LOC607055 | PLCB2     | CTSS         | VAV1     |
| BIRC3     | FAM65B       | STMN1     | DAPP1     | SGOL1        | NUSAP1   |
| VRK1      | TRIB2        | AGPAT3    | ND6       | LOC483397    | INCENP   |
| CD83      | BATF3        | CEACAM1   | ISG15     | GMIP         | HCLS1    |
| SPC25     | MMP12        | CSPG5     | DLA-12    | UNC13D       | BIRC3    |
| VASH2     | FAM155B      | KNSTRN    | HMHA1     | LTB          |          |
| PAG1      | EOMES        | RHEBL1    | CCR5      | TLR8         |          |
| LOC482124 | SLA          | WNK4      | ASPM      | ACRBP        |          |
| DLA-DRA   | KCNK5        | E2F8      | C4BPA     | ARHGEF39     |          |
| MX1       | MX2          | XAF1      | LYN       | CCL20        |          |
| LYZ       | GRK6         | FAM72A    | MCCD1     | LOC100684769 |          |
| C1QA      | LOC607055    | DENND5B   | CYFIP2    | LOC607055    |          |
| RGS18     | SPERT        | CD53      | LOC477558 | CDC20        |          |
| CDC25C    | TRIM22       | BIN2      | TRIM22    | CD3D         |          |

|            |              |           |              |              |
|------------|--------------|-----------|--------------|--------------|
| WDFY4      | AIFM3        | NCAPD2    | GPR15        | BUB1         |
| TSHB       | ARHGAP30     | DLA-DMB   | LRMP         | AIF1         |
| RAD51      | RAP1GAP2     | PAX6      | LOC490399    | CBD139       |
| APOBEC3H   | LIMD2        | CD70      | SIGLEC10     | ZNF292       |
| PDCD1LG2   | FAIM3        | CTSL3     | CSK          | OASL         |
| CYBB       | METTL21D     | CCNF      | TTK          | LOC607937    |
| PBK        | STK17A       | CA11      | SWSAP1       | HMGB2        |
| ECT2       | ITGAL        | FAM83D    | STK17B       | BATF         |
| AIF1       | OASL         | MELK      | FAM72A       | TMEM154      |
| LOC476070  | LTB          | CFTR      | ENO2         | MX2          |
| TRAIP      | DLA-DRA      | ARL5C     | OAS3         | ITGA4        |
| GRIN2B     | CD5L         | SEMA4D    | DDX58        | RILPL2       |
| UNC119     | RAB11FIP4    | CDC25C    | NFKB2        | SKA3         |
| CENPF      | GBP6         | EMR3      | CASP10       | NCAPH        |
| PLCB2      | CELF4        | NCKAP1L   | MX1          | FASLG        |
| TRIM22     | DLA-12       | USH1C     | LOC100684769 | GIMAP2       |
| TMPRSS7    | SRGN         | IFGGB1    | CASP8        | LOC611500    |
| DEPDC1     | GRAP2        | NEIL3     | ADAM23       | LOC100856041 |
| MIS18BP1   | BATF         | DTL       | COTL1        | GPR65        |
| ARHGAP15   | DLA-DMB      | HPSE      | AURKA        | SHCBP1       |
| FAM83D     | KIAA1598     | CENPA     | LAIR1        | COTL1        |
| CD79B      | SH3BP5       | FUT8      | DLA-DMA      | PML          |
| TROAP      | TRIM22       | DNASE2    | MIS18A       | SKAP1        |
| HMHA1      | ZMAT1        | PBK       | PML          | ASPM         |
| DDX58      | SLC4A7       | FERMT3    | GALNT12      | ARHGAP9      |
| ACP5       | HS3ST3A1     | DCK       | LOC102153030 | CDCA3        |
| HLA-DRB1   | LCP2         | DENND5B   | CCNB2        | DLA-DRA      |
| PYY        | MST4         | PLCG2     | IKZF3        | FAM65B       |
| MIS18A     | FABP2        | ESCO2     | PRKD2        | CD80         |
| SPC24      | LOC480600    | ISG15     | LOC483397    | PHF6         |
| CMTM7      | LOC100684560 | FAM118A   | STX11        | LOC608687    |
| C18H7orf72 | ETFB         | CDC6      | CCL5         | CD5L         |
| STK17B     | PLEKHA2      | LOC478994 | RALGPS2      | UBE2C        |



|          |              |           |             |           |
|----------|--------------|-----------|-------------|-----------|
| NR1H3    | TAPBPL       | USP18     | ZDHHHC14    | KCNAB2    |
| FGD3     | COR2T18      | ND6       | OAS2        | GIN54     |
| ADAM23   | MPO          | HLA-DRB1  | MLPH        | LOC612122 |
| TNFRSF14 | CCND2        | KCNA3     | C31H21orf91 | CASC5     |
| CCDC63   | KLRG1        | CENPN     | ZDHHHC18    | SPOCK2    |
| CSK      | ARL4C        | GZMK      | TLR7        | TBC1D10C  |
| PARVG    | ETS1         | BCL2L14   | ARHGAP15    | APOBEC3H  |
| DLA-DMB  | TBC1D10C     | LRRC25    | FAM65B      | RBM11     |
| DHCR24   | APOC1        | GPSM3     | GPR65       | SASH3     |
| ARHGAP30 | TARP         | CENPF     | HERC5       | CORO1A    |
| SBSPO    | C4BPA        | MARCO     | C1QC        | GPSM3     |
| CRIP3    | DLA88        | POLD1     | BTK         | TOP2A     |
| NCF2     | LOC100855540 | CHEK2     | TOP2A       | FEN1      |
| RBM47    | LOC609402    | PARP14    | GCA         | ABAT      |
| SLC1A2   | SAP25        | FOXMI     | CCND2       | NCAPD2    |
| ABRACL   | TRERF1       | POLR3F    | PTPRC       | DCP2      |
| IFIH1    | CD3G         | TRIM22    | CTSH        | ISG20     |
| OOEP     | F12          | ANAPC1    | TRIM22      | SPC25     |
| CFP      | SASH3        | IFNK      | MOV10       | MXD3      |
| SPOCK2   | AIF1         | TOP2A     | CDKN3       | HSH2D     |
| LRRC25   | TRAF5        | KIFC1     | CDK1        | SLX4IP    |
| ASIC5    | TLR8         | ADAMDEC1  | RASSF5      | C1QB      |
| FGR      | FAM13B       | LOC483397 | PTPRJ       | SLC41A2   |
| GPR160   | TRIM17       | LOC482885 | POLE2       | KIF15     |
| MS4A1    | CD101        | MND1      | FBXO6       | CAMK1D    |
| PARP8    | C27H12orf35  | TROAP     | GALE        | WRN       |
| EXO1     | ENPP3        | RHNO1     | CDC42SE2    | CD48      |
| CENPA    | TRANK1       | KCNN4     | NCF4        | CLEC12A   |
| BLK      | EMP3         | POLE      | RPS6KA1     | NIPA1     |
| ZNF252   | KLRD1        | FAM65B    | CCR1        | DENND1C   |
| PKIB     | PSMB10       | TPMT      | TLR9        | REL       |
| CHN2     | IRF1         | MACC1     | SNX20       | MST4      |
| LCK      | PFN1         | KNTC1     | SLC27A3     | HLA-DRB1  |

|              |          |           |          |           |
|--------------|----------|-----------|----------|-----------|
| FSCN1        | ACP5     | KIF15     | POU2F1   | RAD51     |
| GRIP2        | CGA      | NCF1      | IL16     | LY6E      |
| CKAP2L       | FAM57A   | RARRES2   | TREML1   | LAPTM5    |
| ITGAX        | DERL3    | MCM2      | CSK      | RGS10     |
| RND1         | RPS6KA1  | DSN1      | TNFRSF14 | CCND2     |
| C20H19orf66  | GZMA     | LIMD2     | RAD51    | MCM6      |
| GLDC         | IL16     | CHRM3     | PCDHGA3  | CCR5      |
| CCNA2        | IFGGC1   | CD48      | SLC51B   | UNC119    |
| LEF1         | SLC16A6  | MCM3      | TIMD4    | CDC42SE2  |
| TLR10        | UNC119   | GIMAP7    | IFIT3    | CEP152    |
| THEMIS2      | LYSMD2   | NAPSA     | PAG1     | TNFSF9    |
| ARL5C        | CYFIP2   | CSK       | PCDHGA1  | CD69      |
| FAM65B       | RASGEF1A | WFDC2     | RGS10    | TRIM59    |
| KPNA2        | SHMT1    | FEN1      | BCL2L14  | APBB1IP   |
| ITGA4        | COTL1    | ZDHHC14   | POU2F2   | DLA-DMA   |
| CHRNA9       | LFNG     | RMI2      | VCAM1    | PSMB10    |
| FANCM        | POLR2A   | OLFM1     | SMCO4    | CDKN3     |
| CHEK1        | TRPV2    | HMGB2     | FZD2     | CASP12    |
| BLM          | GALNT12  | ACP5      | HCLS1    | NCAPG     |
| CD48         | RNF125   | CD86      | RARRES3  | DENND2D   |
| WRN          | CD38     | TRIM34    | NCAPG2   | STK17B    |
| CASP12       | ATP2A3   | LOC490356 | EARS2    | VRK1      |
| PLTP         | ALKBH4   | LTB       | CDCA3    | LOC488248 |
| CCL3         | IGJ      | KIF11     | PSD4     | VAV1      |
| SWSAP1       | CCL17    | LOC488248 | VWA5A    | BEX5      |
| SYK          | SRGN     | C1QA      | HTR3B    | NUSAP1    |
| IFI44L       | SORL1    | ZNF215    | PSMB10   | INCENP    |
| RACGAP1      | TMEM204  | DLA-DRA   | PDE3B    | HCLS1     |
| DNASE2       | PYGO2    | PTPRCAP   | CCNA2    | BIRC3     |
| ARHGAP11A    | CDC42SE2 | IKZF3     | CD101    |           |
| LOC100856122 | RGS18    | BTK       | SLC41A2  |           |
| ANKS1B       | GNPDA1   | GSG2      | EAF2     |           |
| CD22         | HCK      | FCRL1     | POLE2    |           |

|           |           |              |           |
|-----------|-----------|--------------|-----------|
| BCL11A    | LOC612422 | PLK1         | DHX58     |
| OOEP      | TRIM59    | CYFIP2       | TRAF5     |
| TAF15     | MARCKSL1  | DPY19L1      | NAPSA     |
| BIN2      | SPTY2D1   | PFN1         | NSMCE2    |
| OMG       | PAG1      | CCR4         | TEC       |
| SLA       | ARF6      | MCM6         | NCKAP1L   |
| SPOCK2    | DUSP5     | LOC100686614 | IFGGC1    |
| CLU       | PARVG     | PMAIP1       | SPC25     |
| FABP7     | RUNX2     | ARHGDIB      | DLA-64    |
| LOC610699 | ITGAX     | MEOX1        | MILR1     |
| CD3D      | IL17RA    | BTK          | NFKB2     |
| MCM5      | FMNL1     | CCDC63       | PREX1     |
| SQLE      | MIS18A    | KPNA2        | GRAP      |
| NCKAP1L   | IKZF1     | C7H1orf112   | DOK3      |
| MS4A7     | PARP8     | CD101        | PSPH      |
| IL27RA    | STK4      | CHML         | CD82      |
| DLA-DQA1  | RASSF2    | CD3E         | LY6E      |
| PMAIP1    | SASH3     | AURKA        | LCPI      |
| LYSMD2    | ZNF354A   | ASIC5        | FERMT3    |
| CIITA     | DGKA      | CACNB4       | ISG20L2   |
| CASP8     | DLA-64    | ANKS1B       | LYN       |
| LRRC46    | PARP12    | OOEP         | TMCO4     |
| PLXNC1    | FASLG     | TRAIP        | UBE2L6    |
| FAM72A    | ADD3      | PTPN6        | CAPZA1    |
| RPS26     | TBX20     | CKAP2        | ACTR3B    |
| SASH3     | NRG2      | APOBEC3H     | LOC476070 |
| TRIM59    | EPB41     | FUT8         | LOC481744 |
| KCNA3     | CD3D      | TRIM22       | TGIF2     |
| CARD11    | NUCB2     | CSK          | DNASE2    |
| FEN1      | SDF2L1    | C4H5orf34    | FES       |
| NHLRC3    | LCPI      | SLC15A2      | CCNF      |
| GSG2      | FMNL1     | PREX1        | CIITA     |
| DSE       | KCNMB4    | SCAMP4       | APIS1     |

|              |             |              |           |
|--------------|-------------|--------------|-----------|
| SNX10        | TLE3        | RND1         | TNFSF9    |
| AURKB        | APOBEC3H    | KPNA2        | FABP2     |
| FERMT3       | DEF6        | SPI1         | GRB2      |
| GPR114       | DLA-DMA     | MLLT11       | SYTL1     |
| GBP1         | LYZ         | INCENP       | PBK       |
| LY86         | MLLT11      | PFKP         | B4GALT6   |
| PYGO2        | PTPRCAP     | CENPL        | PLD4      |
| SUCNR1       | CXCL13      | RASGRP1      | CXCR5     |
| ACTR3B       | VAMP1       | CD33         | GPRC5D    |
| PTGS2        | SPOCK2      | KLHDC9       | NCAPH     |
| AK7          | CASP8       | GBP6         | DEPDC1B   |
| ARSB         | BIRC3       | VRK1         | MLF1IP    |
| KYNU         | THEMIS      | LOC100684769 | PLK4      |
| HCLS1        | ANKDD1A     | ACRBP        | F12       |
| COTL1        | CORO1A      | OMG          | DTX3L     |
| PTPRJ        | PTPRC       | DDB2         | KPNA2     |
| KCNA2        | PLCG1       | IRGM         | UBFD1     |
| MX2          | IL18        | CIITA        | KIF11     |
| PLD4         | HCLS1       | ARHGAP15     | CD70      |
| ACRBP        | CIITA       | PSMB8        | PTPRC     |
| LOC100684769 | SLC41A2     | BLM          | HTR6      |
| TNFRSF9      | RAB37       | RAP1GDS1     | KIF4A     |
| CXCR4        | KIAA0513    | CDCA2        | PARP8     |
| ISG20        | NFATC2      | TNFRSF14     | LOC403529 |
| ZNF292       | FLT3        | CEP72        | RACGAP1   |
| TP53I3       | NCAPG       | ITGAX        | ABAT      |
| RARRES3      | CPLX3       | PPP4R4       | NFYA      |
| ELL3         | TNFSF9      | FBN2         | CENPI     |
| WSCD2        | PQLC3       | LRR1         | GPR18     |
| CEP152       | CAP1        | ZMAT1        | REL       |
| OAS1         | TSPAN5      | UBFD1        | NIPA1     |
| NR0B1        | CREBRF      | ELAVL2       | SNN       |
| AP1S3        | C20H19orf35 | ARHGEF39     | TNIP2     |

|          |           |             |            |
|----------|-----------|-------------|------------|
| cOR52H7  | TNFAIP8   | CD40        | BTK        |
| CCNF     | SORL1     | TLR7        | KIF23      |
| MELK     | EDEM1     | OOEP        | C11H9orf91 |
| FUT8     | ANXA3     | LYN         | DSE        |
| EAf2     | ANKRD50   | CYBB        | RRP1B      |
| DLA-DOA  | NMB       | GIN51       | TMPRSS7    |
| USH1C    | SLC7A6    | LOC479820   | GPSM3      |
| GMIP     | LRRC70    | MASTL       | RCC2       |
| LRRC8D   | CTRL      | FAM49A      | UNC119     |
| OTUD7B   | TTF2      | SWSAP1      | LPIN2      |
| PRMT8    | TPST2     | UNG         | PARVG      |
| ZNF16    | TIPARP    | RRM2        | LPCAT1     |
| ORC6     | CSNK1G1   | DDX58       | PARP11     |
| RHEBL1   | EBI3      | NME1        | SPI1       |
| MLF1IP   | AK8       | SLA         | KIF2A      |
| COTL1    | PSMB8     | CCR6        | PRR11      |
| ITGB2    | LOC481744 | IL18        | SPOCK2     |
| LCPI     | SRCIN1    | LYZ         | UBE2T      |
| PTPN6    | SLC26A8   | SHMT2       | BLNK       |
| COL19A1  | IL21      | PIK3CD      | KPNA2      |
| LYN      | IRAK4     | OTUD7B      | GNAO1      |
| HMGB2    | PNLDC1    | NUGGC       | DCLRE1C    |
| STMN1    | GNPDA1    | STIL        | SPOCK2     |
| KIF15    | GRK5      | FAM221A     | CENPF      |
| MARCKSL1 | GMIP      | RAD18       | APOBEC3H   |
| RAPGEF6  | PIK3CG    | CKS2        | CARD11     |
| SEMA4D   | CSK       | CACNB4      | RILPL2     |
| PML      | IRF8      | TRIP13      | ITGAL      |
| DEPDC1B  | FGR       | RANGRF      | GNPDA1     |
| PREX1    | ARHGAP15  | C20H19orf66 | ARHGEF39   |
| MSMO1    | UCP2      | P2RY10      | SLC15A2    |
| SKAP1    | WBSCR17   | FBXL14      | C7H1orf85  |
| INCENP   | PLBD2     | MBOAT1      | RIN3       |

|           |            |           |              |
|-----------|------------|-----------|--------------|
| LOC479820 | REL        | AUNIP     | PRELID2      |
| PRKCB     | ROCK1      | CD79B     | PFKP         |
| CYBA      | GRAMD3     | ZNF252    | DNTT         |
| CD74      | LRIT1      | LRP11     | C6           |
| PARP14    | TNFRSF14   | cOR6M4    | DEFB123      |
| RTN4RL1   | LHX2       | TSPAN1    | NUF2         |
| CCND2     | DDIT4      | STAP1     | LOC100686614 |
| MND1      | DOCK11     | CD19      | MXD3         |
| TMEM173   | LOC477182  | DERL3     | C27H12orf35  |
| UNG       | CD48       | NACC1     | MBOAT1       |
| GDPGP1    | WFDC2      | SKAP2     | IRF8         |
| PAX5      | ETS1       | CD72      | CHEK2        |
| GP9       | CD97       | KIF2C     | GMCL1        |
| KIAA0226L | PKLR       | COTL1     | RABEP2       |
| ZDHHC14   | RBM11      | CEP55     | ANAPC1       |
| DNAH9     | PRF1       | TRABD     | ERICH1       |
| GINS2     | TMEM231    | GLRA1     | MYO9B        |
| SCG3      | CEPT1      | FAM60A    | SURF6        |
| CTSS      | SEC61B     | ARSB      | CD40         |
| SLC41A2   | CTRL       | CARD11    | SLC46A3      |
| LYN       | DDX26B     | LYN       | SGOL2        |
| SCG5      | PTPRE      | PSAT1     | MFNG         |
| PLBD2     | C25H8orf58 | LOC477558 | SWAP70       |
| TNFSF9    | ARHGEF3    | IL2RA     | ARHGAP9      |
| MASTL     | TNFSF11    | POLA2     | KNSTRN       |
| FIGNL1    | TAF15      | STK17B    | TBC1D30      |
| GPR34     | GPSM3      | ITGAL     | NAGA         |
| NOP58     | FERMT3     | CD5L      | CDHR2        |
| EVI2B     | CCL3       | PSMB10    | STOML1       |
| ARHGDIB   | DTX1       | GALK1     | IFI6         |
| BLNK      | KLRK1      | MIS18BP1  | DLGAP5       |
| RGS1      | CYTH1      | POLH      | NIPA1        |
| KIAA0513  | RAP1B      | PARP11    | DGCR8        |

|            |            |           |             |
|------------|------------|-----------|-------------|
| TMEM154    | ARF6       | DLA-DMA   | BLM         |
| PSD4       | ZNF217     | DOCK8     | SSH1        |
| TMEM140    | ANTXR2     | CD22      | RIPK2       |
| TFPI2      | ERLIN1     | LOC489372 | SEMA7A      |
| GRAP       | SEMA4D     | ALOX5AP   | STAMBPL1    |
| PSMB10     | TMEM187    | PARVG     | IFI35       |
| TLR3       | CDKN3      | APBB1IP   | RASGRP2     |
| MXD3       | AKNA       | LOC481744 | EIF5A2      |
| HPSE       | ADCY7      | LYSMD2    | SLC6A6      |
| ORC1       | S100PBP    | SAMSN1    | LPCAT1      |
| CYFIP2     | PSME2      | FAM187B   | TRIM34      |
| ENO2       | PFKP       | TMEM216   | GIN5A       |
| PEX26      | TNIP3      | MGMT      | SKA3        |
| BPIFB1     | ISG20L2    | RPL34     | FUT8        |
| FAIM3      | TFEC       | PARP9     | PPP1R12C    |
| PSMB8      | COL19A1    | POLE2     | PTPRCAP     |
| TAP2       | PEX26      | UPB1      | DAPK1       |
| NUGGC      | PDE4B      | LOC609038 | IL6         |
| KIAA1467   | GRAMD1B    | CD40LG    | PSMB8       |
| CDCA2      | MIER1      | CD6       | MASTL       |
| HELLS      | KLRD1      | CKAP2L    | SPIC        |
| GALNT3     | AR         | TFAP2B    | TP53I11     |
| SKA3       | CLEC4E     | DNAH8     | SGOL2       |
| ABAT       | TGFBR1     | PCNA      | G6PC3       |
| PTPRCAP    | CYP2D15    | PLD4      | CATSPERG    |
| SLA        | PARP9      | PCDH8     | EBI3        |
| CD3G       | SAG        | STX11     | TMEM173     |
| HMGCR      | C32H4orf32 | PLBD2     | DEPDC1      |
| TAP2       | RGS6       | BPHL      | CNTN5       |
| GSAP       | ABCB1      | BLNK      | GMIP        |
| CD37       | ARHGD1B    | FAM26F    | C31H21orf91 |
| C7H1orf112 | CLNK       | CECR1     | SYK         |
| LPCAT1     | DNAH3      | CHN2      | SHMT1       |

|           |           |           |           |
|-----------|-----------|-----------|-----------|
| CKAP2     | DTX3L     | LY6E      | SEC23B    |
| UNC13D    | CCDC117   | CD2       | MITD1     |
| CMA1      | TNFAIP3   | PLXNC1    | MIS18BP1  |
| CTBS      | DGCR8     | LY6E      | ARHGEF2   |
| LPCAT1    | IL12A     | MAP4K1    | CCNB3     |
| AURKA     | RRAS2     | DYRK3     | FGD3      |
| KIF11     | IFI16     | SIGLEC10  | OSGIN2    |
| RAB20     | DCP2      | DLA-DOA   | GFI1      |
| PTPRC     | CAMK1D    | LOC484934 | PTDSS1    |
| USP18     | RRAS2     | SULT1D1   | WRN       |
| IFT122    | LOC476825 | EZH2      | DLA88     |
| FXVD2     | PSD       | TFEC      | PAX5      |
| POC1A     | VAV1      | KIF15     | BANK1     |
| KIAA0895L | IL27RA    | TLR10     | SETDB2    |
| IKZF1     | ACTR2     | LOC491107 | BANK1     |
| LRMP      | LOC479975 | RPS26     | ACOT12    |
| GMCL1     | GALNT10   | IFI35     | SH2D1A    |
| CSF1R     | TESC      | CD79A     | FUCA1     |
| SGOL2     | ATAD2     | ELANE     | LOC607937 |
| TAGAP     | SEC23B    | CDHR2     | PWP2      |
| APOA1     | TMEM154   | TAPBP     | CIAO1     |
| RARRES2   | DNAH2     | DNASE2    | ECT2      |
| RCVRN     | EFCAB3    | BCL2A1    | CD48      |
| MYL4      | ERN2      | TUBA1B    | BTLA      |
| DYX1C1    | IL13RA2   | HEY1      | WDR4      |
| GUCY1B3   | HDAC1     | LOC491550 | PXK       |
| RHBDL2    | ATP6V1E2  | SPOCK2    | TMEM206   |
| C7H1orf85 | PMEPA1    | LOC485220 | VASH2     |
| COL1A2    | STK10     | TIMELESS  | IL18      |
| SAP30     | MAP3K1    | KIAA1598  | TEX14     |
| FKBP10    | DAPP1     | C9H9orf9  | CST7      |
| CD300C    | CSK       | CCDC109B  | SLC2A6    |
| UBFD1     | LOC610177 | ENPP3     | RAB11FIP4 |



|              |           |              |           |
|--------------|-----------|--------------|-----------|
| MCM2         | FCER1A    | TP53I3       | GNPDA1    |
| LSAMP        | LOC484934 | ZWILCH       | RAB31     |
| DAPP1        | ZBTB7B    | DSCR3        | CEACAM16  |
| LOC479668    | PLSCR3    | BCL11A       | EMP3      |
| DENND2D      | PDCD1LG2  | KCNA6        | MAP4K2    |
| SIGLEC10     | ARHGEF6   | CD3G         | LOC608103 |
| CENPK        | RAB7L1    | CEP89        | NME1      |
| TBC1D10C     | CRLF3     | TMEM154      | TFPI2     |
| AK8          | B3GNT2    | TRIM59       | SPAG4     |
| LCK          | ACRBP     | NKRF         | LYPLA2    |
| TRABD        | RIN3      | CRIP3        | EXO1      |
| SMAP2        | PTTG1     | KYNU         | TTPAL     |
| LOC483397    | MOB3A     | FASLG        | TRIM14    |
| CDHR2        | ZNF323    | CD37         | SKA3      |
| ABHD12       | MBOAT1    | LOC100686390 | C1QTNF3   |
| LTBP1        | HM13      | HAUS1        | TGFB1     |
| CXCL12       | AK2       | TBX4         | DGCR8     |
| LOC100685971 | HEMK1     | SMARCAD1     | LRR1      |
| PRKD2        | FOXRED2   | LOC610565    | TAPBP     |
| UMOD         | TSGA10    | CD74         | ZUFSP     |
| DEFB132      | SH3KBP1   | UNG          | DOCK11    |
| MYO7A        | CDKN1B    | FAM122B      | BPHL      |
| ARHGAP9      | UBN1      | RBM47        | CD80      |
| R3HDM4       | GSAP      | RFC1         | FAM60A    |
| TTYH2        | LOC488258 | TUBA1C       | RAB11FIP4 |
| TRIM34       | NDC80     | ERAP1        | CD33      |
| CD3E         | MIER1     | CEPT1        | ARPC4     |
| LRRK1        | ABAT      | CCNE2        | SCAMP4    |
| UBE2T        | SCNN1G    | LIG1         | SIRT6     |
| RAB42        | LOC609039 | TPX2         | CDC25C    |
| LOC485220    | C1QC      | DTX3L        | PLEKHO1   |
| CD27         | SZT2      | KBTBD7       | TSTD1     |
| NCAPD2       | ARHGAP9   | SKAP1        | RBP5      |

|              |           |           |           |
|--------------|-----------|-----------|-----------|
| IL16         | FMNL3     | TMEM144   | TRAIP     |
| VAV1         | NCOA3     | LOC488305 | BATF      |
| LOC100686309 | FAM111A   | KIAA1804  | PIK3AP1   |
| FAM117B      | DOCK11    | PAX5      | MOB1A     |
| TP53I11      | LOC485601 | SERPINA1  | MLLT11    |
| TIGD4        | PDIA3     | DLA-DQB1  | PEX10     |
| FMNL1        | PARP8     | IFI44L    | PAPPA2    |
| SERPINE1     | LOC609235 | IGSF9     | RANGRF    |
| NFKB2        | TSKU      | SPOCK2    | FAM185A   |
| GINS1        | TF        | EPSTI1    | GALNTL5   |
| SLX4IP       | IL27RA    | MILR1     | ST8SIA4   |
| CATSPERG     | SMC4      | CASP12    | VRK1      |
| SMAP2        | RBP5      | ACOT8     | DSN1      |
| TCF19        | IQGAP2    | LOC612422 | FMNL3     |
| LOC481744    | GCA       | LCPI      | RAD18     |
| FAM49A       | SWSAP1    | NASP      | MOB1A     |
| FAS          | SNX10     | ARHGAP30  | AGER      |
| GALNT7       | LAIR1     | SLA       | PHF6      |
| DBF4         | CDADC1    | LAPTM5    | TAP1      |
| PTDSS1       | SLBP      | ARMC9     | DOK1      |
| SGOL1        | ITPR3     | DNM1L     | ENPP3     |
| CTSH         | STK17B    | RPL22     | GRIP2     |
| CTSC         | MGAT4A    | FREM2     | TRANK1    |
| CTSZ         | MAN2A1    | NLE1      | CHKA      |
| ATP2A3       | DENND1C   | MTHFD2    | ZNF292    |
| ADRA1B       | LOC479975 | HEY1      | RASGRP3   |
| DOCK8        | TAP1      | TRAF5     | SPSB2     |
| SLC4A7       | ABLIM1    | HAUS8     | LOC476669 |
| CHN1         | RECQL     | POU2F2    | GALNT3    |
| STAP1        | RBL2      | SEMA7A    | ATP6V0A2  |
| MOV10        | RSP02     | LEF1      | SNX10     |
| COL11A2      | RIT1      | URB1      | RUFY3     |
| NEK2         | HSH2D     | EVI2B     | ZKSCAN2   |

|            |             |           |             |
|------------|-------------|-----------|-------------|
| ACOT8      | CARD11      | PPIL6     | SGOL1       |
| EZH2       | SMCO4       | MST4      | C10H12orf56 |
| KIF2C      | CMTM6       | PSME2     | GBP1        |
| CKS2       | TOP2A       | CD74      | ADRBK2      |
| SORL1      | ERP27       | MYL5      | RND1        |
| ETS1       | PTPRE       | CD3D      | CDK4        |
| CEPT1      | SSH2        | RAB31     | CTSC        |
| ZMPSTE24   | PCSK1N      | DBF4      | CCNE1       |
| C11H9orf91 | TIPARP      | PGLS      | CENPL       |
| ENPP2      | RASA2       | LOC610164 | FANCM       |
| CPA3       | ABRACL      | SASH3     | PDCD1LG2    |
| IL27RA     | RNF32       | FDXACB1   | OSBPL7      |
| CDC42SE2   | PTPRO       | RPS6KA1   | MAP2K6      |
| PIK3AP1    | LOC491369   | GRK4      | SLC9A8      |
| SEMA7A     | FAM69A      | PTPRC     | TRAPPC10    |
| POU2F1     | AOAH        | CAMK2D    | DEF6        |
| CRHBP      | CAPZA1      | M6PR      | CTRL        |
| PLCG2      | CD9         | FAM111A   | PITPNM1     |
| TOP2A      | CFLAR       | DNMT1     | NEK2        |
| CPXM1      | MAP4K2      | PHF6      | SBSPON      |
| SORL1      | ACTR3B      | KANSL2    | HMGB2       |
| DENND1C    | ATP8A1      | TIGD4     | ARL4C       |
| DDX21      | TNFRSF14    | THOC1     | GPATCH3     |
| RNF145     | AURKB       | ODC1      | SFI1        |
| NME1       | SSBP4       | CDT1      | IFIT1       |
| ERLIN1     | HEMK1       | PAPPA2    | MS4A1       |
| SKAP2      | LAX1        | COTL1     | MATK        |
| DNMT1      | C8H14orf119 | TEC       | PIKFYVE     |
| PRPSAP2    | ACTR5       | LOC480921 | UBE2G2      |
| ZNF133     | MOB1A       | UBE2T     | CCDC50      |
| TAP1       | GDPGP1      | PRR11     | C9H17orf80  |
| TRIM37     | TBC1D2B     | CCL5      | CD3D        |
| LOC403581  | CREM        | MXD3      | RRM2        |

|           |              |              |         |
|-----------|--------------|--------------|---------|
| POU2F2    | TMEM263      | LOC100855609 | EGLN2   |
| DERL3     | OSBPL7       | DSCC1        | RFX5    |
| CDC45     | GPR39        | C2CD5        | PRELID1 |
| OLFM1     | P2RX7        | RSPH3        | MTERFD1 |
| ALKBH4    | CLEC12A      | R3HDM4       | TPM3    |
| RABEP2    | GNMT         | CBX5         | ZNFX1   |
| SGOL2     | BUB1         | AMD1         | TOP2A   |
| UCP2      | LOC100688470 | SERPINA1     | ZDHHC18 |
| TYROBP    | TAPBP        | CPZ          | TMEM216 |
| TTF2      | CD70         | PPIF         | PHF16   |
| SNAP23    | UNC13D       | TMEM130      | SPATA2L |
| TNC       | FLI1         | FANCI        | CHEK1   |
| ST3GAL5   | IL2RB        | FAM185A      | CERS6   |
| CLEC4E    | CDC42SE1     | TCOF1        | FAM189B |
| GFRA1     | CDC25B       | DLA-DQB1     | HMHA1   |
| RPS24     | OAS1         | FANCA        | SNX2    |
| KCNAB2    | DDX26B       | KBTBD8       | S100PBP |
| MCM8      | CCNB2        | ZDHHC13      | TPST2   |
| KCNA6     | LRMP         | TF           | CD1E    |
| PARP8     | CELA1        | ANKLE1       | MST4    |
| CTLA4     | LY9          | CD80         | HELLS   |
| GRIN2B    | SNX20        | FIGNL1       | SLC9A7  |
| CHST2     | ZBTB37       | LOC488258    | PPP6R1  |
| NCAPG2    | AGER         | SLC38A1      | TP53I11 |
| XAF1      | NUCB2        | TAPBP        | STK4    |
| LOC491550 | ZUFSP        | BIRC5        | BLM     |
| SAPCD2    | IKZF3        | MYCBP        | FAM13B  |
| CCDC172   | PSIP1        | PARP8        | ICOSLG  |
| CRYGA     | APBB1IP      | IL2RG        | CDC45   |
| EPSTI1    | SPATA19      | MYL4         | ZAR1L   |
| ESCO2     | ST3GAL5      | DCLRE1C      | APIS3   |
| SLC6A12   | LOC100684605 | NUP37        | MYCBP2  |
| FGD2      | ALG8         | DNAH10       | KRTCAP3 |

|              |           |         |           |
|--------------|-----------|---------|-----------|
| CNPY3        | RAP2A     | DPPA5   | LOC482124 |
| DNTT         | WAS       | MSH6    | TRIM44    |
| COL9A2       | LRRC71    | LPCAT1  | TMEM150B  |
| IFI35        | CD44      | SGOL2   | RRAS2     |
| MCM6         | SPIC      | RHPN2   | CTSS      |
| HERC5        | FCHSD1    | IRF4    | FAM111A   |
| CACNB4       | TMPO      | BCAT1   | LACE1     |
| GPSM3        | DIDO1     | CCDC150 | EZR       |
| CHRM3        | LOC609540 | SASH3   | DGKA      |
| IL2RG        | TP73      | KCNA2   | CCNE2     |
| LOC100688778 | TMEM74B   | PCDHA5  | CCDC50    |
| ELANE        | EBP       | TSHB    | KAT2A     |
| SUZ12        | SLC5A3    | KCNAB2  | TMEM154   |
| SLC2A6       | ATM       | NUP205  | NFYA      |
| LGALS9       | ALOX15    | TLR9    | FAM190A   |
| MYO5A        | ELOVL5    | ABHD12  | SASH3     |
| SDF2L1       | NCKAP1L   | SCN2A   | HMGNI     |
| FAM3B        | TP53I11   | MCM4    | SACM1L    |
| SASH3        | DNMT3L    | FBXL14  | SASH3     |
| LOC483842    | ANXA9     | ACSL5   | PLK1      |
| DLA88        | MXD3      | ATR     | ERO1LB    |
| RANGRF       | LY6E      | CCR5    | LRRC25    |
| EBP          | NEIL3     | RALGPS2 | ACOT8     |
| MYCBP2       | ABHD15    | THEMIS2 | CFLAR     |
| LOC609038    | USP20     | PTCHD2  | ACTR5     |
| BANK1        | ALG10     | MOS     | SMIM14    |
| HAUS1        | ZBPB      | HMHA1   | SAP25     |
| MFNG         | ITPR3     | MOV10   | GPR34     |
| FMNL3        | TMPO      | WDFY4   | ANXA3     |
| SRRM2        | CNIH2     | GPR39   | CXCR6     |
| LOC608103    | HMGB2     | LGALS9  | SPC24     |
| FCHSD2       | ITGA4     | RRP1B   | MYO5A     |
| RFWD2        | NIPA1     | NOP58   | GNG13     |

|              |          |            |          |
|--------------|----------|------------|----------|
| ABCA3        | EZR      | CCNE1      | CSNK1G1  |
| PFKP         | ARRB2    | NUP160     | SNX8     |
| DSN1         | RAPGEF6  | TCF19      | CD22     |
| NIPA1        | HECA     | ZNF292     | CPNE1    |
| DGUOK        | EP400    | DIAPH3     | WDFY4    |
| NAPSA        | CSNK1G1  | ARHGEF6    | LYZ      |
| FCRL1        | LRR1     | C18H7orf72 | PRKCD    |
| LOC100684560 | MAN1A1   | TLR8       | GUSB     |
| CENPN        | CARHSP1  | POU2F1     | STK10    |
| MAP3K19      | TRIM37   | LOC476669  | IRGM     |
| RBM11        | PABPC5   | TUBB       | DYRK3    |
| NLE1         | TP53INP1 | KIF2C      | POLH     |
| PNLIPRP2     | CLCF1    | CFP        | CCR4     |
| BRINP1       | MOB1A    | TAGAP      | CYTH4    |
| POLE         | IRF4     | GMCL1      | KCNN4    |
| RAD18        | PRIMA1   | RAD1       | SRRM2    |
| HMHA1        | TYROBP   | WDR4       | RFC2     |
| PIWIL4       | GLIPR1   | TMEM173    | KIAA0226 |
| FOXM1        | GLIPR2   | FMNL1      | KIFC1    |
| FAM122B      | B2M      | WRN        | ATAD2    |
| TOPAZ1       | CCDC88B  | CTSH       | GNRH1    |
| DYRK3        | FAM100B  | PCNXL2     | RRP7A    |
| IRF5         | GLI3     | MITD1      | SCPEP1   |
| TRIM17       | CBD139   | LPXN       | SIDT2    |
| PSME2        | KNSTRN   | BLM        | ZNF276   |
| DLA-DMA      | KBTBD8   | DKC1       | TEX15    |
| LOC607281    | ENO2     | PTBP1      | ATP10D   |
| MAP4K1       | PKIB     | CRYGA      | MYOF     |
| BIRC5        | KCNN4    | RNFT2      | TESC     |
| DPY19L1      | TMCC2    | GALNT6     | DTL      |
| LOC610177    | ZNF292   | LETMD1     | INTS2    |
| IL33         | RAD51    | IDH3B      | IRF5     |
| IGFBP7       | NIPA1    | BRIP1      | EZH2     |

|         |         |             |           |
|---------|---------|-------------|-----------|
| MSMO1   | EFCAB4B | CCDC77      | FUT8      |
| ADAM11  | ABCG1   | MSH6        | FAM83D    |
| AK2     | IGSF3   | DHX58       | CDCA2     |
| NRG2    | CACNA1I | ITPKA       | GINS1     |
| APOE    | MYNN    | GBP1        | NSF       |
| RASSF5  | UBASH3B | ZNF485      | GINS2     |
| UBA2    | MYO1G   | EIF2AK2     | SLC35B2   |
| ATR     | GPR18   | BRCA2       | ARHGEF6   |
| FUCA1   | ZNF292  | FKBP11      | TRIP13    |
| CENPL   | MLF1IP  | C21H11orf82 | MYCBP2    |
| TSEN54  | FAM111B | RCC2        | TNFRSF14  |
| ANKLE1  | EIF2AK3 | MSH2        | DENND4A   |
| OAS2    | SHD     | ACTR3B      | WRN       |
| FAM126A | ESPL1   | SLAMF1      | ZNF292    |
| ZBTB7B  | KCNAB2  | PRELID1     | AR        |
| GINS4   | DSCR3   | ATP6V1G3    | LOC480921 |
| DNER    | RNF19B  | DYX1C1      | MTHFR     |
| SLC9A8  | RPS6KA1 | GP9         | ACTR2     |
| CENPI   | LLGL2   | C27H12orf35 | PARP8     |
| DTX3L   | FAM69A  | SNN         | TPMT      |
| SPI1    | SFMBT2  | HMGN1       | JRKL      |
| DLA-DOB | PDE7A   | LOC610699   | IL33      |
| ZNF488  | LMNB1   | WARS2       | CHML      |
| SCAMP4  | AK8     | FAIM3       | LOC485601 |
| CHST4   | RELT    | CCND2       | CCR3      |
| FAM185A | CHST7   | IRAK3       | PARP12    |
| CXCR5   | PSIP1   | MTHFD1L     | EIF2AK2   |
| LRR1    | CREB1   | TSPAN15     | ARID1A    |
| GBP1    | LBR     | RECQL       | BAX       |
| CSK     | IFIH1   | SERPINB8    | IRF1      |
| CD74    | LBH     | TBC1D31     | TFPI2     |
| BANK1   | HSD17B7 | CDC42SE2    | PSME2     |
| LY6E    | CCNF    | TNFRSF14    | PRKD3     |

|           |          |           |           |
|-----------|----------|-----------|-----------|
| FMNL1     | TSEN54   | PARP12    | LOC607937 |
| DHFR      | CD200R1  | LOC607281 | PPIL6     |
| TESC      | FZD2     | CYP7A1    | APOE      |
| SLC22A15  | ADAMTS14 | PWP2      | FMNL1     |
| FAM13B    | GMFB     | CCR3      | GH1       |
| ODC1      | CD74     | FAM175A   | SSH1      |
| RALGPS2   | WRAP73   | ZNF428    | C8H14orf1 |
| CHML      | BAX      | HPS6      | CRYGS     |
| CCDC109B  | TXNDC11  | RNASEH2C  | CALCA     |
| OTOP1     | CREB1    | NOXO1     | IMMP2L    |
| DNASE2    | POLR3G   | DDX21     | CATSPERG  |
| GMFB      | P2RY10   | SPSB2     | FBXL14    |
| CDA       | RPE65    | TNIP3     | LOC479820 |
| PDCD11    | KRTCAP3  | MIS18BP1  | RRAS2     |
| TRAF2     | HAUS6    | SLC23A1   | CAPZA1    |
| CLIC2     | CDC20    | PPIL1     | PPM1G     |
| ARPC4     | CLIC1    | RABEP2    | KLHDC9    |
| CXCR4     | FABP7    | TICAM2    | ELMOD2    |
| PARP12    | ATAD5    | LTA       | ACRBP     |
| MTHFD1L   | CISH     | RRP7A     | MARCO     |
| GUSB      | NUF2     | SPDL1     | SLC24A5   |
| RILPL2    | EMR3     | CSTF2     | CKAP2L    |
| RNFT2     | CDCA7L   | IFGGC1    | P2RY10    |
| TP53I11   | EXO5     | PRKX      | AUNIP     |
| LOC477182 | VCPIP1   | C1QC      | DENND5B   |
| LRRK1     | HDAC1    | TLR3      | MAP4K1    |
| GRK6      | SBNO1    | RAD1      | SNAP23    |
| AP3S1     | SNN      | PCDHGA3   | RQCD1     |
| ITGAL     | HMHA1    | RAPGEF6   | P2RX5     |
| FKBP11    | TTYH2    | CDCA8     | IRF9      |
| CPZ       | PRKCZ    | REN       | INCENP    |
| ETS1      | ASPM     | AHCY      | ZNF513    |
| C4H5orf34 | DNAH9    | GSTCD     | SLX4IP    |



|           |              |          |             |
|-----------|--------------|----------|-------------|
| CAMK1D    | GLTSCR1      | E2F5     | G3BP1       |
| SEMA4C    | KIAA0101     | GPR180   | APBB1IP     |
| LOC488258 | PTCHD2       | ZDHHC13  | PAFAH2      |
| BLM       | MMD          | DHFR     | MYO1G       |
| LOC488248 | TPCR63       | SERPINA7 | CTRL        |
| GIMAP4    | INTS2        | SLC7A10  | CXCR4       |
| HAUS3     | TAP2         | NFXL1    | C10H12orf66 |
| NCAPH     | GRIP1        | SGOL2    | NPRL2       |
| CXCL16    | TTC14        | IMMP2L   | GMCL1       |
| BAI2      | SLBP         | KIAA0513 | ELOVL5      |
| FBXO5     | CHSY1        | TIMD4    | SLC4A7      |
| TUBA1B    | STMN2        | CDK4     | SH3BP5      |
| SLC15A2   | ZNF276       | WDR62    | MYC         |
| RASGEF1B  | SHCBP1       | SNRPA    | GMFB        |
| SAT1      | LRMP         | OSBPL7   | DENND1C     |
| USP1      | RIT1         | GALC     | SLC25A19    |
| P2RY10    | GAK          | PPP1R3E  | U2AF1       |
| DCLRE1C   | PHLPP1       | TRIM14   | RASSF2      |
| ZNF169    | VWA5A        | RYR2     | WASF2       |
| TMEM106A  | TRIM11       | SPATA17  | CENPA       |
| CDK4      | IL33         | RAD54L   | ZNF16       |
| PTPRC     | GNA13        | TYMS     | HPS4        |
| RGS6      | GPR180       | DOK3     | FAM49A      |
| TMEM86A   | OPN1SW       | WDHD1    | CLU         |
| RNF145    | CYBB         | IRF8     | TTI2        |
| RASGRP3   | CERK         | PSIP1    | CD53        |
| LOC607055 | HSPH1        | ZNF16    | POLD1       |
| ZDHHC24   | LOC100688778 | MYO5C    | LY6E        |
| CD40LG    | USP48        | CTLA4    | ITGAX       |
| REL       | LOC488305    | AGK      | LOC607281   |
| CEACAM23  | ARG2         | RPA3     | MCM10       |
| DLA-64    | ELMO1        | TNFSF9   | ADORA2A     |
| DUSP6     | NUB1         | CDC7     | IKZF1       |

|           |             |              |           |
|-----------|-------------|--------------|-----------|
| MCM10     | STK39       | SYTL1        | CDA       |
| C8H14orf1 | DLGAP5      | CEP164       | ZDHHHC13  |
| PRKCD     | TCEAL5      | CLIC6        | ADPRH     |
| SPOCK3    | FGFR1OP     | CDK4         | FAM26F    |
| RPA3      | VRK1        | SLBP         | UNG       |
| HHAT      | FLNA        | LRBA         | DNAH7     |
| BTAFL     | STK38       | DENND1C      | PUS7L     |
| SEMA3D    | UBE2J1      | PES1         | RNASEH2C  |
| HAAO      | ABCA3       | RFXANK       | ARHGAP24  |
| RTKN2     | CASC5       | BRCA1        | ARRDC5    |
| RPL22     | ANP32E      | SLC41A2      | DPPA5     |
| MCCC1     | SLC22A11    | CBX5         | TFEC      |
| IL12A     | SLC25A38    | ZNF292       | EBP       |
| IFIT1     | PCDHA5      | TEX14        | CEP170    |
| KIF2A     | LYSMD3      | FAM69A       | ALKBH2    |
| NASP      | PHF20L1     | GUCY1B3      | CCR7      |
| PHF6      | RPL19       | WAS          | MORC3     |
| FBN2      | MGA         | CD27         | ERC2      |
| TUBB      | C20H19orf66 | HAMP         | TMEM106A  |
| ABCA4     | SPAG5       | NUDT1        | ADRBK1    |
| B4GALT6   | TUBB        | DTD2         | BDH1      |
| SLC23A1   | FAR2        | S100A9       | IRAK3     |
| GGT1      | BTG2        | ENG          | BRIP1     |
| KIFC1     | SP4         | APIAR        | IL2       |
| HCK       | FBXO33      | LRRC8D       | SDF2L1    |
| ZAR1L     | MSL2        | LOC100687347 | CXHXorf21 |
| BAZ1A     | TGFB1       | DUSP5        | CAPG      |
| CCNE1     | ARPC4       | SRFBP1       | CYTIP     |
| MST4      | NFYA        | CBX5         | DIABLO    |
| GALNT12   | TAF8        | ENTPD3       | URB1      |
| IFIT3     | TAP2        | SLC6A12      | WIPF1     |
| TKTL1     | ZDHHHC17    | WRN          | SLBP      |
| MAP4K2    | TGIF1       | TRA2B        | BAZ1A     |

|              |            |            |           |
|--------------|------------|------------|-----------|
| IL4I1        | NCF1       | GDPGP1     | COL11A2   |
| TLR9         | C34H3orf70 | TMPRSS11D  | APIB1     |
| GEN1         | SPATA13    | CD300C     | LOC403829 |
| PARP11       | SURF6      | EIF1B      | CNTRL     |
| SH3BP5       | C6H7orf43  | TOP1       | TNF       |
| PIK3CD       | FAM65C     | FIGNL1     | HIP1R     |
| PRELID1      | POLK       | GNB3       | CAMK2D    |
| ARPC1B       | VASH2      | ALG10      | MCM6      |
| SPO11        | OGG1       | SRBD1      | PLXNC1    |
| DYRK3        | CXCR6      | LOC403581  | PPP1R21   |
| GOLM1        | FAS        | GABPB1     | WDR91     |
| ATRNL1       | TPM3       | METAP1     | ARPC1B    |
| ODF2L        | FAM189B    | ARMC5      | MGAT2     |
| FANCG        | CENPL      | ITFG2      | CCL2      |
| LLGL2        | OPTN       | LRRC8B     | TNFAIP8   |
| HIRA         | PRDX4      | SMAP1      | SLC29A3   |
| KIF18A       | FYN        | BAX        | PHF10     |
| ID11         | PDCD4      | PMS2       | LOC484934 |
| CP           | MFSD6      | PCNA       | TTC23L    |
| MCM3         | RGS17      | DYRK3      | PDIA4     |
| TNF          | GDPD3      | DLA-12     | HEMGN     |
| CXHXorf21    | HLTF       | RRP1       | CEP55     |
| HSD17B7      | SEC61B     | SMCO4      | PCED1B    |
| LCP2         | ELOVL5     | NSF        | KANSL2    |
| GRB2         | DPYSL5     | CHAF1B     | ITPR3     |
| CXCL10       | INCENP     | RBP3       | FBXO5     |
| CECR1        | CHD1       | C1H19orf40 | DENND2D   |
| CCR1         | PITPNM1    | ADSS       | CCDC102A  |
| TRAF4        | PRR11      | E2F1       | TTC9C     |
| LOC100855609 | IPO11      | CYP2D15    | GGA2      |
| SMCO4        | ACTR2      | PPA2       | SKAP1     |
| CASP4        | OSTF1      | C13H8orf76 | TCF19     |
| DUSP5        | CHMP1A     | PLEKHA5    | C9H9orf9  |

|              |              |          |           |
|--------------|--------------|----------|-----------|
| CUBN         | TMEM176B     | SMC4     | GNAI2     |
| SLC38A1      | LOC476445    | HCLS1    | WDR37     |
| IKZF3        | ABLM1        | KDM5D    | TTC7A     |
| MMD          | LOC100856565 | TEX30    | MRT04     |
| STK39        | PNMA1        | RBM15B   | LTA       |
| C1R          | SLC2A6       | EXOSC3   | USP48     |
| PABPN1       | CDCA3        | KIF18A   | XKR9      |
| CDKN2AIPNL   | GTF2H3       | AMICA1   | P2RX7     |
| PLEKHA2      | GABRG3       | DGCR8    | GALNT7    |
| DCP2         | NUSAP1       | CSTF3    | GATSL3    |
| NUP93        | TUBA1B       | NDC1     | NUP93     |
| RABGAP1L     | ACTR3B       | MGME1    | GBP1      |
| FGFR1OP      | ADAM11       | EZR      | CFL1      |
| CCR6         | RILPL2       | ZDHHC24  | PLA1A     |
| LOC100856041 | CBLC         | PDIA4    | DENND5B   |
| PFKL         | C5H11orf57   | PRKD3    | TAP2      |
| APBB1IP      | ZNF783       | LRMP     | CCL8      |
| CD79A        | GPATCH3      | RAN      | PCDH8     |
| RRM2         | SUCO         | BID      | TOMM34    |
| SLC30A1      | SPOCK2       | NAGLU    | SPATA19   |
| SPAG4        | BPTF         | CLDN9    | ANP32E    |
| ARHGEF2      | XAF1         | CTRL     | FMNL1     |
| CDK20        | FAM118A      | STK35    | MFSD6     |
| POLE2        | BRAT1        | PDSS1    | PYCRL     |
| CD4          | RBM14        | ARHGAP9  | CREB1     |
| SETDB2       | TNFRSF9      | NUP43    | TAGAP     |
| BCL2L14      | TBKBPI       | CDA      | C4H5orf34 |
| F5           | NLRC3        | VAV1     | CCT8      |
| PRKCZ        | PCNA         | MMP12    | LOC611606 |
| TUBA1C       | SMCR8        | CD160    | CAPN10    |
| WDFY4        | CDK1         | CDKN2AIP | ERCC6     |
| LOC612422    | ARHGEF6      | VAV3     | THOC1     |
| MSH6         | SBNO1        | EBNA1BP2 | MCM2      |

|             |           |          |           |
|-------------|-----------|----------|-----------|
| ARHGEF39    | YWHAQ     | KIAA0391 | TCOF1     |
| PRELID2     | CAPN10    | PRR22    | ZSWIM3    |
| LIPA        | DRD2      | WDR62    | LOC479974 |
| E2F8        | BNIP3L    | RPL22L1  | CCDC6     |
| CHTF18      | ST3GAL4   | QTRT1    | POLA2     |
| FAM71D      | FAM187B   | MRT04    | TRIM25    |
| WDR76       | SEMA4C    | AK2      | OTOR      |
| ADPRH       | KIF23     | SAP30    | CCL4      |
| B2M         | SLX4IP    | AIF1     | EIF1B     |
| MBD5        | LOC484323 | CASP2    | STXBP2    |
| TMEM231     | HERC3     | RPA3     | REFXANK   |
| FGR         | ESYT3     | EBI3     | PRPSAP2   |
| C27H12orf35 | MTF2      | TLX1     | SMC4      |
| TRIP13      | FEN1      | GALC     | SKAP2     |
| TMEM216     | AK7       | RANBP1   | SDC1      |
| DRAM2       | CHST11    | PRIM2    | LRRC36    |
| PQLC3       | GIN5A     | CIAO1    | GNAI2     |
| PLA2G4F     | CCL22     | NETO2    | DAPK1     |
| ALOX5AP     | EBP       | PCED1B   | HSD17B4   |
| EMP3        | RNF213    | HERC5    | MYD88     |
| RASGRP2     | CCNA2     | INTS7    | SLC19A1   |
| SLC36A4     | PGS1      | CTSS     | FEN1      |
| CDH2        | SCAMP5    | LRRC71   | CPO       |
| E2F1        | RPA3      | WDR89    | TARBP1    |
| BST2        | AQR       | ZNF75D   | HEMK1     |
| MMP12       | API53     | CASP12   | GBA       |
| LIPA        | CTSC      | IGSF6    | FCHSD2    |
| SUPT7L      | LPCAT1    | NUB1     | ADSS      |
| CST7        | STK35     | TMEM107  | MCM5      |
| GALC        | PRRC2B    | ADORA2A  | CNPY3     |
| ARHGEF38    | HP1BP3    | NOC3L    | MORC2     |
| WDR4        | NEK2      | PPAT     | CD300C    |
| C34H3orf70  | ITGAE     | UHRF2    | RNFT2     |

|          |              |            |           |
|----------|--------------|------------|-----------|
| IRAK1BP1 | DOCK8        | MYO5A      | TMEM107   |
| PGLS     | MFAP1        | NOL9       | UNC13D    |
| CLEC9A   | ZDHHC20      | LOC485601  | CEP72     |
| COR2T18  | HSPA4L       | MPHOSPH10  | ARMC5     |
| NIPA1    | POLD4        | MYOF       | L3MBTL3   |
| SEMA5A   | HSPH1        | ICOS       | HAUS8     |
| NUP37    | HAUS3        | C9H17orf80 | FBXL14    |
| PIEZO2   | SLC16A11     | SYK        | TLR8      |
| ATP6V0D2 | DGCR8        | SPAG5      | STAT5A    |
|          | LCTL         | MYD88      | LGALS9    |
|          | LOC403529    | DCTPP1     | IL27RA    |
|          | GPR114       | DDX47      | MIS18BP1  |
|          | CDC6         | LPCAT1     | SLC14A1   |
|          | SS18         | LOC490917  | ATR       |
|          | FIP1L1       | PSD4       | ZWILCH    |
|          | C1QB         | POLR2A     | AHCY      |
|          | RGS2         | BFSP2      | GPN2      |
|          | LOC100684605 | CD83       | AKR1C3    |
|          | OR10A4       | TTLL1      | ALDH16A1  |
|          | DOCK3        | SCML4      | MTMR4     |
|          | VIL1         | RILPL2     | SPEF1     |
|          | PHF23        | LOC474791  | AAR2      |
|          | CREBRF       | GALNT7     | PPIF      |
|          | FGR          | AEN        | GLA       |
|          | KRT18        | DEFB122    | LOC610565 |
|          | BTBD11       | LDHB       | TMEM176B  |
|          | ANLN         | MCM7       | UCP2      |
|          | CDKN1B       | OAZ3       | GALNT10   |
|          | EZH2         | CFL1       | TTC21A    |
|          | CREB3L4      | LPIN2      | ABCC1     |
|          | FNDC3A       | LIPT1      | DNAH5     |
|          | NELL1        | TSEN2      | A2M       |
|          | TRIM4        | F12        | SPHK2     |

|            |             |          |
|------------|-------------|----------|
| GLCCI1     | CASP4       | HPS6     |
| FLT3LG     | GUCY1B3     | LCMT2    |
| NCR3       | SMIM8       | CD80     |
| SLC38A1    | MARS2       | ASIC5    |
| OAS3       | MAP3K8      | MGAT1    |
| S100A2     | SLCO2A1     | ENTPD7   |
| KIF15      | DRAM2       | SMARCAD1 |
| AKAP13     | TPM3        | ALOX5AP  |
| SAP130     | CELA1       | PPAN     |
| LOC483397  | GOLM1       | TRIM59   |
| C34H3orf70 | FASTKD1     | B2M      |
| FBXO4      | CTSO        | E2F8     |
| MADD       | TDG         | AIF1     |
| RBM12      | CASP10      | GRIN2B   |
| LOC477558  | OSGIN2      | SERTAD4  |
| RPL27A     | CHRM1       | TST      |
| CYBB       | CXCR6       | CENPK    |
| CHD3       | ECE2        | DHCR24   |
| CD83       | TRAF4       | DENND3   |
| ADRBK1     | CENPQ       | TRMU     |
| SHFM1      | SPIC        | HEMK1    |
| ABCC10     | TSTD1       | ZCWPW1   |
| REN        | SLC25A32    | CMPK2    |
| IL4I1      | NIN         | ZC3HAV1  |
| UBE2W      | DGCR8       | NOC4L    |
| UTP6       | POU3F4      | NUSAP1   |
| PKLR       | CEP152      | FAM49B   |
| FAM49B     | PPCDC       | RPA2     |
| CKAP2L     | NIPAL2      | CHRNA3   |
| SKA3       | C10H12orf66 | HTT      |
| LOC403581  | GNGT2       | CDPF1    |
| HOGA1      | SREBF2      | ZNF252   |
| PLCB2      | ANXA3       | UGGT1    |

|          |             |            |
|----------|-------------|------------|
| CCDC11   | RBM14       | GIT2       |
| ZNF614   | UBLCP1      | PLEKHG1    |
| APAF1    | EXOSC2      | NDE1       |
| IL25     | G6PC3       | CEP250     |
| XYLT2    | ADPRM       | DDX20      |
| CSPG4    | EIF5A2      | CDKN2AIPNL |
| ANTXR2   | CAMK1D      | AJAP1      |
| MTHFS    | TRIM50      | CNR2       |
| ARSE     | STAR        | PSIP1      |
| MT4      | EME1        | TBC1D14    |
| HAND1    | ALPK1       | MANBA      |
| SPC24    | LOC612071   | RAB3GAP1   |
| TTLL4    | ITGAE       | SLC1A2     |
| ATP8A1   | TGM7        | DENND4A    |
| OTOP1    | MEN1        | FTSJD2     |
| MICU1    | SLC25A24    | CSRNP2     |
| PLK1     | TNFAIP8     | SCAF4      |
| PPP1R16B | FAM154B     | ZCCHC12    |
| ZMYND10  | TLR7        | ARID4B     |
| FICD     | DSE         | FLI1       |
| CFLAR    | CD200R1     | RUFY3      |
| ZMAT2    | IFIT1       | LRRC14     |
| PSD4     | FAM13B      | BCHE       |
| LRRC59   | LRRC59      | NUP153     |
| PHF6     | PTPRC       | BPNT1      |
| PLXNC1   | CERKL       | SLA        |
| PPRC1    | WDR76       | CREB1      |
| A4GNT    | B4GALT6     | RNF145     |
| NRAS     | SRSF9       | HHEX       |
| FAM71B   | UBE2J1      | CTSA       |
| TP53I11  | NPPA        | CSTF1      |
| PLEKHA1  | C8H14orf119 | FDXR       |
| NRSN1    | FAM129C     | SFT2D2     |



|           |              |              |
|-----------|--------------|--------------|
| TMEM140   | DQX1         | PLEK         |
| AHSP      | DDX47        | MFAP3        |
| FAM64A    | ODF2L        | ARSB         |
| ZNF800    | NPM1         | KIAA1370     |
| ADSS      | KLHL18       | PIEZO1       |
| E2F1      | SLC25A14     | LOC475708    |
| SMEK1     | PPM1E        | POLE         |
| PI4K2B    | ITPR1        | KIF5C        |
| PIK3IP1   | OSBPL5       | MYL4         |
| HAVCR1    | GEN1         | SH2B3        |
| EDEM3     | AKAP3        | SLBP         |
| ERICH1    | PRKCD        | GSKIP        |
| ZC3HAV1   | MATK         | MTO1         |
| MTERF     | GCN1L1       | BCL10        |
| GRB2      | ZNF323       | ITPR1        |
| TAGLN3    | SWAP70       | SETDB1       |
| CREBRF    | CLP1         | C13H8orf76   |
| LOC613008 | FXVD2        | CKAP2        |
| FRYL      | NUSAP1       | TXNDC16      |
| TRAIIP    | RASGRP2      | TFEB         |
| SUZ12     | LOC102157036 | DUSP5        |
| MCM5      | RASGRP3      | NFKBID       |
| ZCCHC6    | SMAGP        | PDIA5        |
| FBXL14    | LOC482691    | RNF145       |
| AP3M1     | SHMT1        | LOC100688778 |
| NUAK2     | UBA2         | STAT2        |
| C7H1orf85 | SLC19A1      | ZFC3H1       |
| SEZ6L2    | ERAP2        | FAM175A      |
| ABHD13    | DLA-64       | PAXBP1       |
| S100A12   | SNRNP40      | AMD1         |
| CCDC85B   | TCEA1        | IL2RA        |
| KIAA1370  | GMCL1        | SLC7A6       |
| TRA2B     | FGD3         | LACC1        |

|              |          |              |
|--------------|----------|--------------|
| MED15        | SNW1     | HLTF         |
| VASP         | ST8SIA4  | CHST2        |
| SUCO         | PARP8    | MEN1         |
| PDE7A        | APEX1    | SENP8        |
| PEX6         | APRT     | SNAP23       |
| FGFR1OP2     | STK10    | G6PC3        |
| ZNF711       | EIF4E    | ZMYND10      |
| PFN3         | HMHA1    | BRCA1        |
| SND1         | PSMB9    | CNOT1        |
| ANGEL1       | CRLF3    | PKMYT1       |
| POLH         | NCOA5    | SLC9B1       |
| SLC10A7      | MCRS1    | SCAMP4       |
| USP35        | LRRC40   | LRRC8D       |
| STK39        | GMIP     | MCRS1        |
| RAB8A        | GEMIN4   | cOR52H7      |
| SLPI         | EHD3     | TROAP        |
| DNAJB9       | RABGAP1L | TRIM37       |
| LOC481791    | TIMM8A   | MOB3A        |
| SPC25        | DHX36    | CSNK1G1      |
| LOC100855903 | DCP2     | C1QB         |
| ALAS2        | SLC25A16 | LOC100688904 |
| ZFP30        | EARS2    | FOXRED1      |
| CCL4         | RANBP1   | DENND4A      |
| KIAA1524     | RIPK2    | UBR7         |
| ARID1A       | KBTD6    | TIMM8A       |
| IGFLR1       | ILF2     | PRKD3        |
| TXLNA        | PAXIP1   | SRM          |
| HUWE1        | LSM7     | MND1         |
| LOC100855609 | IKZF1    | RARRES1      |
| LOC484976    | NOP56    | GRIN2B       |
| GSTO1        | PAICS    | BACH1        |
| S100A9       | CAPRIN2  | CDC20        |
| RAD18        | GMNN     | NR2F6        |

|           |           |           |
|-----------|-----------|-----------|
| PHKG2     | PRPF4     | VANGL1    |
| MSN       | LACE1     | MCM3      |
| PIM2      | SLX4IP    | TMEM260   |
| CNN2      | DDX39A    | IL18BP    |
| SLC1A6    | RPUSD4    | C8H14orf1 |
| SLC35C1   | ATAD2     | RRM2B     |
| INPP5B    | ARL6IP1   | RPS19BP1  |
| G6PC3     | LOC483987 | FUT1      |
| TNF       | SPTLC2    | PIM2      |
| KIF4A     | FSIP2     | SLC15A4   |
| ADORA3    | FGFR1OP2  | POP5      |
| PLD3      | PLCB2     | CAMK1D    |
| PRPSAP2   | FAM122B   | CAMKMT    |
| PSKH1     | RAB27A    | KNTC1     |
| LOC607281 | AP1S1     | EVL       |
| MGAT1     | USP1      | ZNF133    |
| TRIM26    | GK        | ARPC2     |
| SRPK1     | LOC479974 | RRP1      |
| MIER1     | DDX18     | MTR       |
| LRRC59    | UBA2      | FOXMI     |
| GUCA2A    | PRPSAP2   | CAPS      |
| FAM58A    | THEM4     | WNK4      |
| LIM2      | CPSF3     | PCDHGA12  |
| IFNG      | NR1H3     | SPO11     |
| OVCH2     | KLHL42    | GPALPP1   |
| RNF213    | RBMX      | RASAL1    |
| KBTBD7    | GNRH1     | KCNAB2    |
| GAPT      | TBC1D10C  | ALG10     |
| PRKX      | TGIF2     | TRADD     |
| POLR3G    | TGS1      | TRAFFD1   |
| UBE2F     | ALKBH2    | ATP6V1E2  |
| GIT2      | PTBP1     | NAGPA     |
| ORA12     | PPP1R12C  | ALPK1     |

|           |           |             |
|-----------|-----------|-------------|
| ESCO1     | SFI1      | RANBP1      |
| SGTB      | CAPZA1    | HSD17B7     |
| JAK1      | CNP       | PDCD10      |
| CERS6     | RBM15B    | TSGA10      |
| TCOF1     | CNOT6L    | TSPAN14     |
| CPXM1     | LOC485693 | ETNK1       |
| PTPN6     | NCOA3     | SRSF5       |
| ATXN7     | NOL6      | USP49       |
| TMCO4     | PA2G4     | RELT        |
| FAM208A   | R3HCC1L   | IDO1        |
| SLC15A1   | CLEC4E    | CDC25B      |
| CYTH4     | SRCIN1    | NOL9        |
| RNGTT     | RAB25     | TUBB        |
| LOC485570 | DHRS13    | C8H14orf119 |
| CNR1      | C1QB      | LGMN        |
| DBF4      | MAP4K2    | RECQL       |
| MYSM1     | OAS3      | MAPRE1      |
| KMT2A     | EXOSC6    | ZNF133      |
| SLC37A3   | PIK3AP1   | RAB25       |
| RHOG      | LOC403529 | GIMAP7      |
| MS4A7     | UBR7      | DPAGT1      |
| TRIM62    | SFXN2     | CYLD        |
| NFYA      | TRAT1     | ZNF252      |
| IL10RA    | EBP       | SHCBP1      |
| SPINK2    | U2AF1     | LOC607328   |
| NCF4      | FAM65B    | SLC23A2     |
| HDDC3     | MIF       | CAPN10      |
| WRN       | RPP25     | KCNA2       |
| CDK9      | MTBP      | TBC1D10A    |
| GNG3      | OR16D05   | SUCO        |
| KIAA1967  | ADORA2B   | FAM65C      |
| MCMBP     | STOML1    | APOF        |
| S100A3    | CENPP     | RELL2       |

|           |          |            |
|-----------|----------|------------|
| MRPS26    | TRMT10C  | ZNF839     |
| FUBP1     | FAM103A1 | PARP1      |
| PML       | SFXN1    | YARS       |
| GPR12     | DDX52    | COPG2      |
| SUPT16H   | TAP2     | PI4KA      |
| PRM2      | FMNL1    | BRCA2      |
| LOC482235 | RAD51B   | RAB20      |
| TRAM1     | ARRB2    | NKRF       |
| STAMBPL1  | PAN3     | ELF1       |
| FAM49A    | MAT2B    | HEMGN      |
| MED23     | SAPCD2   | MANF       |
| DCUN1D3   | ASUN     | GEN1       |
| MXD4      | NFE2L3   | METTL2A    |
| ARHGEF39  | SF3B4    | NUPL1      |
| STMN1     | SNX30    | NCOA3      |
| BCAT1     | CEP78    | NOD1       |
| RFWD2     | CNOT3    | RAB8A      |
| NLK       | NDC1     | ABHD1      |
| LRRC41    | TRIM28   | WDR83      |
| LOC611067 | PRPS2    | CBLC       |
| GPA33     | CLEC9A   | IFIT2      |
| NEURL     | BCL10    | SACM1L     |
| COMMD10   | MSR1     | DPF2       |
| ZNF513    | MYO9B    | STRADA     |
| WIPF2     | PYCRL    | OOEP       |
| KMT2E     | POLR3G   | RSAD2      |
| CTSS      | DDX39B   | RASGRP2    |
| ADAM23    | TM7SF3   | KIF15      |
| STARD4    | PDF      | CSNK1G2    |
| NCK2      | EIF4A1   | C7H1orf112 |
| LOC612867 | SRSF1    | TUBA1B     |
| PPP1R12A  | ARHGAP24 | BBX        |
| HSD17B7   | LRRC16A  | IL2RG      |

|          |            |            |
|----------|------------|------------|
| RAB4B    | UHRF1      | UNC93B1    |
| STXBP2   | TFRC       | RHBDL2     |
| ZCCHC6   | HDAC1      | SLC22A15   |
| OR13F1   | CXCL10     | PCNA       |
| DCTN5    | FGR        | LMBR1L     |
| CDC42SE1 | WDR43      | PRPH       |
| P2RX5    | PAK1IP1    | NAT9       |
| OR16G03  | FOXM1      | SLC39A10   |
| LRRC8D   | EMG1       | EMB        |
| ESCO2    | NIPA1      | KIAA1731   |
| PLA2G4F  | MARCKSL1   | MEN1       |
| KIAA1109 | C9H17orf53 | MOV10      |
| TNIP2    | CEACAM30   | DDX39A     |
| TBL2     | ADPGK      | C20H3orf62 |
| TTC23L   | RFC3       | TANK       |
| ARHGEF2  | CDKN2AIPNL | PAPD7      |
| GTF2H2   | SLC35F2    | TXLNA      |
| UBA52    | ERAP1      | CD274      |
| SCN2B    | RAB8A      | SLC37A1    |
| MADD     | DLA88      | PML        |
| CSRNP2   | ZDBF2      | ZDHHC21    |
| PRDM4    | TTC23L     | GFM2       |
| FOXC2    | HMGA1      | RFC3       |
| KLHL11   | ST3GAL5    | RNF26      |
| XPO6     | GTF3C4     | FAM122B    |
| G3BP1    | PML        | ST3GAL5    |
| ELMO2    | NSUN5      | EFR3A      |
| KCNA5    | APOF       | NUP205     |
| TEX36    | SNX2       | PRPF4      |
| HELZ     | SETDB2     | GGT1       |
| IL21R    | SLC35A2    | E2F1       |
| CDKN2C   | WDR75      | ACTR2      |
| ACTG1    | METAP1     | NCAPD2     |

|              |          |           |
|--------------|----------|-----------|
| VCPIP1       | ABRACL   | RAD1      |
| IGDCC4       | KIF24    | ASTE1     |
| IQGAP1       | TXK      | CLK2      |
| PKMYT1       | NPM2     | FAM111B   |
| LOC100856638 | HMGB3    | HAUS6     |
| AKAP10       | DERA     | NIPAL2    |
| LPCAT1       | FANCL    | OOEP      |
| DGKZ         | CDKN2AIP | MYL5      |
| KLF12        | CDKL2    | HSD17B7   |
| PREX1        | IL27RA   | WAS       |
| NUFIP2       | CYP51A1  | ACAT2     |
| ADAMTS10     | GSKIP    | RELB      |
| SH2D3C       | ASPHD2   | BRPF1     |
| TBXA2R       | TCERG1   | RNASEL    |
| PGLS         | PSIP1    | R3HCC1L   |
| CAB39L       | DLA-DQA1 | NR1H3     |
| RNF24        | NUP85    | MYCL      |
| PBXIP1       | H2AFZ    | TTLL12    |
| TTC31        | ZUFSP    | RASSF3    |
| CYBA         | GMFB     | OLFM4     |
| C6           | MCRS1    | PNPLA6    |
| ARID4B       | UNC13D   | MSN       |
| GPR34        | TSEN54   | CDH11     |
| SAG          | APLF     | RANBP1    |
| KDM2B        | CD1A6    | SUCO      |
| NFKB1        | SDF2L1   | AGPAT1    |
| RANBP9       | REL      | LOC608103 |
| GDPD5        | TK1      | MFSD5     |
| ZNF449       | METTTL14 | ANKRD12   |
| NCAPH        | BAZ1A    | PTPN1     |
| SGOL1        | PAAF1    | DCK       |
| HAUS1        | KIAA1524 | WDR16     |
| PIWIL4       | TEX15    | UBA2      |

|              |          |           |
|--------------|----------|-----------|
| PARN         | ABAT     | FBXW9     |
| ZNF667       | POLR3G   | DCP2      |
| ADNP         | HS3ST3A1 | SLCO5A1   |
| UPK3B        | FGD2     | FZD5      |
| RFTN1        | MYC      | SRFBP1    |
| BAG4         | CCT6B    | ELF1      |
| OPTN         | SLC25A15 | SPAG11B   |
| LOC403530    | SEC23B   | GALNS     |
| RS1          | DIP2A    | NANS      |
| TRIM33       | SLC5A3   | GOLM1     |
| SEMA4A       | GRAP     | ZZZ3      |
| RAPGEF6      | TOMM5    | CNTNAP1   |
| FRYL         | RPS3     | APLF      |
| GMCL1        | GNS      | ASPHD2    |
| TTC7A        | CDK5RAP2 | IDH3B     |
| THEMIS2      | APAF1    | ODC1      |
| UBE2C        | HNRNPAB  | ARG1      |
| PAK1         | RPTN     | ZNF485    |
| PPP4R2       | DENND2D  | ITGA4     |
| GLYATL3      | MYB      | SMAP2     |
| MPEG1        | TFAM     | KCNK5     |
| OTUD7B       | CD274    | EIF2AK1   |
| SP3          | LY9      | TMEM222   |
| ELF2         | CTRL     | LOC609039 |
| ELF1         | SNX12    | SLA       |
| LOC100855593 | ZNF513   | COG4      |
| ALG1         | RFC2     | FDXACB1   |
| PRND         | TCEAL5   | MCOLN1    |
| TOP2A        | THUMPD2  | GSTA4     |
| PHF6         | FAM58A   | ATXN3     |
| GLRX         | NXNL1    | WDR46     |
| GNG2         | ITGA4    | SLC35F5   |
| TET1         | WDR34    | GRK5      |



|          |           |             |
|----------|-----------|-------------|
| RICTOR   | PTPN1     | BCAT1       |
| TBC1D24  | SPO11     | SMAP2       |
| FASTKD5  | CDCA7L    | KMT2A       |
| ZNF366   | OSM       | AGPAT3      |
| PTBP1    | CTSZ      | MAP3K1      |
| DBP      | HAUS3     | SMAGP       |
| MCM6     | PCTP      | SLC25A24    |
| FANCG    | NUPL1     | SYCP2       |
| RSPRY1   | CEP152    | RAD1        |
| DAZAP2   | IRF5      | NOC3L       |
| LIG4     | PDCD11    | NDEL1       |
| GNB1     | WRAP73    | UFSP2       |
| XIAP     | BUB3      | MAT2B       |
| CCDC85B  | TRIM37    | B3GNT2      |
| ATP8B2   | HCK       | RGS18       |
| ATP6V0E1 | LOC491839 | COLEC10     |
| FAM117A  | FAM49B    | LRRC40      |
| ACTN4    | PRKD2     | TAP2        |
| RORA     | ARF3      | FKBP15      |
| EFTUD1   | CHTF18    | KIF15       |
| DIP2A    | F5        | CNOT11      |
| ABHD15   | UTP14A    | C21H11orf82 |
| RBM23    | ACTR2     | GPR180      |
| RACGAP1  | INTS2     | KDM2A       |
| HAPLN2   | TFAM      | CXCR4       |
| CD74     | POP5      | OASL        |
| ALKBH2   | INTS10    | ST3GAL4     |
| FAM117B  | CCT8      | BPIFB1      |
| NPHS1    | NOP56     | FCGR2B      |
| GNPNAT1  | MOB1A     | BATF3       |
| KIF5C    | SPTLC2    | EBAG9       |
| TP53     | LAIR1     | TCEA1       |
| PLSCR4   | NUP153    | CFLAR       |

|              |              |           |
|--------------|--------------|-----------|
| ACTRT3       | SLC22A15     | EXOSC6    |
| SPATA2L      | SLAIN1       | ARID1A    |
| LTA4H        | TBP          | RTN4RL1   |
| GMPR2        | MED23        | DIDO1     |
| USH1C        | RQCD1        | UHRF2     |
| EVL          | XRCC2        | ALKBH6    |
| G3BP2        | TRIM37       | PRKX      |
| RLIM         | LOC610614    | USF1      |
| GPRI52       | CAPS         | DNMT1     |
| FMR1         | ACAT2        | ZNF227    |
| MAP4K1       | UTP15        | LOC482691 |
| TBC1D10A     | LOC100856713 | CDC6      |
| RCSD1        | EXOSC7       | SEL1L2    |
| ZNF770       | DDX23        | CDC42SE1  |
| LOC100688904 | CNPY3        | HNRNPAB   |
| SNRNP48      | CDK20        | COASY     |
| KIF2C        | POLR1B       | RPP25     |
| MGAT2        | CAECAM1      | SIN3A     |
| ZFP30        | SMC1A        | CDT1      |
| LOC487366    | SGK196       | TMEM30C   |
| MAD2L1BP     | S1PR1        | ETS1      |
| EFR3A        | NMBR         | ACSL5     |
| CDC7         | GLA          | ITPR1     |
| IL1RAP       | RPA2         | RHEBL1    |
| ECT2         | P2RX5        | MED6      |
| NCAPD2       | MS4A1        | DNAJB7    |
| HAMP         | GPR173       | FYB       |
| ENTPD7       | PINX1        | ITSN2     |
| CRIP1        | NAT10        | SHARPIN   |
| KLHL8        | STK4         | SMC1A     |
| CYTH2        | CLEC12A      | LOC482885 |
| SOCS4        | DNM1L        | ARID4B    |
| FAM107B      | FANCE        | GABPB1    |

|           |           |             |
|-----------|-----------|-------------|
| MFSD1     | ZNF526    | LDB1        |
| MCM10     | PAICS     | STK35       |
| LSP1      | ARPC4     | TLR7        |
| RFC1      | FRG1      | SMAP1       |
| SLC7A10   | ARHGEF6   | OSTF1       |
| LOC479974 | ELOVL5    | PSME1       |
| CEP152    | SMAP2     | XPO6        |
| ARPC4     | RBM12     | ZNF614      |
| PIK3R1    | POLD3     | SLCO1A2     |
| ARHGAP12  | SEC61B    | KDM2B       |
| YARS      | LOC612106 | GON4L       |
| MPEG1     |           | PPP2R3C     |
| UBE2W     |           | UBA2        |
| IFT140    |           | LOC474791   |
|           |           | LOC483987   |
|           |           | C30H15orf57 |
|           |           | ZNF75D      |
|           |           | CHPF2       |
|           |           | PCDHGB7     |
|           |           | HMG2        |
|           |           | SCG5        |
|           |           | OVGP1       |
|           |           | DDX5        |
|           |           | PAK1IP1     |
|           |           | RM12        |
|           |           | ZFHX2       |
|           |           | DIP2B       |
|           |           | LRRRC24     |
|           |           | PISD        |
|           |           | C9H17orf80  |
|           |           | UBR4        |
|           |           | BTAF1       |
|           |           | ZBTB49      |

TLK1  
SLC31A1  
AK7  
ZNF215  
CNP  
LGALS8  
RBM27  
GDPGP1  
PHKA2  
ABRACL  
HK1  
PPP1R9B  
TAF6L  
DSCR3  
HERC6  
ILVBL  
FBXO18  
KCNA6  
CKS2  
MYO19  
PHKG2  
ARHGEF6  
ADAMTS10  
STIM2  
RAB27A  
RNF38  
SLC23A1  
UTS2B  
KCNA3  
BUB3  
VWA9  
LOC100856122  
SMARCAL1

CTH  
TRAF3  
ORC6  
KIF18A  
MSL2  
FXN  
CIAO1  
CLP1  
TSEN15  
DAP3  
PPRC1  
TM2D2  
CLCN7  
PSIP1  
MYEF2  
SGOL2  
MTRF1L  
CD79A  
BYSL  
ENTPD1  
C27H12orf57  
SLC7A10  
CEP152  
HEXB  
ATP2A3  
AP1M1  
USP1  
SESN3  
MVD  
ZNF335  
GRIN2C  
ZDHHC24  
RYS2

INTS7  
GNPNAT1  
CDKN1B  
MBD4  
ATM  
TRMT112  
SNN  
KBTBD6  
SLC25A32  
CHD3  
CAFA-T2R67  
BFSP2  
ZBTB17  
ATP6V0E1  
ITPR3  
ERAP2  
VPS18  
WDR43  
CCL28  
FAM134C  
C12H6orf70  
LOC100855485  
SLC25A16  
FANCG  
PGAM1  
SLC25A1  
SNRNP40  
SPAG5  
SFXN1  
PYGO2

**Supplemental Table S2: 146 genes identified from a 290 gene set in common in the 4 MDR canine tumors by a Cytoscape analysis to be highly interconnected.**

| Clusters | Nodes<br>in<br>Cluster | Node<br>% | Node List                                                                                                                                                                                                                                                     |
|----------|------------------------|-----------|---------------------------------------------------------------------------------------------------------------------------------------------------------------------------------------------------------------------------------------------------------------|
| 0        | 38                     | 0.2603    | APBB1IP, CARD11, CD2, CD33, CD3D, CD48, CD53, CD74, CD80, CD86, CSK, CTSS, CYBA, CYBB, DAPPI, FGR, HCLS1, HLA-DRB1, IDO1, ITGAL, KIF15, KIF4A, LAIR1, MAP4K1, NCF4, PIK3CD, PLCB2, PRKCB, PRKD2, PTPN6, PTPRC, SASH3, SELL, SEMA4D, SH2D1A, SLA, TRIM22, VAV1 |
| 1        | 30                     | 0.2055    | AURKB, BUB1, CCNA2, CCNB2, CCNF, CDC20, CDK1, CENPL, CEP152, DLGAP5, DTX3L, ECT2, ESPL1, INCENP, KIF23, MIS18A, NCAPD2, NCAPG, NCAPH, NDC80, NEK2, NUF2, PLK1, PML, RACGAP1, SPC24, SPC25, STMN1, TUBB, VRK1                                                  |
| 2        | 17                     | 0.1164    | BCL2A1, BIRC3, CASP8, CD83, CORO1A, FASLG, FERMT3, FMNL1, IFIH1, ITGA4, ITGAX, ITGB2, LTB, PARVG, PMAIP1, TNFRSF14, TNFSF9                                                                                                                                    |
| 3        | 10                     | 0.0685    | CCND2, E2F1, EZH2, FEN1, NUSAP1, RAD51, SWSAP1, TRIM37, TUBA1B, WRN                                                                                                                                                                                           |
| 4        | 10                     | 0.0685    | CCL19, CCL20, CCL5, CCR5, CXCL10, GPR18, GPR65, GPSM3, ISG20, P2RY10                                                                                                                                                                                          |
| 5        | 10                     | 0.0685    | ARHGAP15, ARHGAP30, ARHGAP9, ARHGDIB, FAM13B, FGD3, GMIP, PREX1, RHOH, TAGAP                                                                                                                                                                                  |
| 6        | 8                      | 0.0548    | PSMB10, PSMB8, PSME2, PTTG1, REL, TAP2, TRAIP, UBE2C                                                                                                                                                                                                          |
| 7        | 5                      | 0.0342    | ACTR3B, ARPC4, CYFIP2, NCKAP1L, TF                                                                                                                                                                                                                            |
| 8        | 4                      | 0.0274    | GINS4, MCM10, MCM5, MCM6                                                                                                                                                                                                                                      |
| 9        | 4                      | 0.0274    | BATF, CHITA, IKZF1, IKZF3                                                                                                                                                                                                                                     |
| 10       | 4                      | 0.0274    | KCNA2, KCNA3, KCNA6, KCNAB2                                                                                                                                                                                                                                   |
| 11       | 2                      | 0.0137    | FYB, SKAP1                                                                                                                                                                                                                                                    |
| 12       | 2                      | 0.0137    | EBI3, IL27RA                                                                                                                                                                                                                                                  |
| 13       | 2                      | 0.0137    | C1QB, C1QC                                                                                                                                                                                                                                                    |

## Supplemental Table S3: Gene enrichment

**Network Pathway enrichment, FDR < 0.001**

| Gene Set                                    | Proteins in geneset | Proteins from network | P-Value  | Nodes                                                                                                                                                                                                                  |
|---------------------------------------------|---------------------|-----------------------|----------|------------------------------------------------------------------------------------------------------------------------------------------------------------------------------------------------------------------------|
| Signaling by Rho GTPases                    | 338                 | 30                    | 5.23E-13 | CYFIP2, CDC20, PREX1, RACGAP1, NCKAP1L, PLK1, ARHGAP9, NUF2, RHOH, GMIP, VAV1, INCENP, FGD3, CENPL, SPC24, SPC25, FAM13B, NCF4, ARHGDIB, CYBB, CYBA, ARHGAP15, ECT2, ARPC4, NDC80, ARHGAP30, TAGAP, AURKB, BUB1, FMNL1 |
| Mitotic Prometaphase                        | 175                 | 18                    | 3.34E-09 | CDC20, NCAPG, NCAPH, PLK1, NUF2, TUBB, INCENP, CENPL, NCAPD2, SPC24, SPC25, NEK2, CCNB2, NDC80, CDK1, AURKB, BUB1, CEP152                                                                                              |
| Aurora B signaling                          | 40                  | 10                    | 3.76E-09 | STMN1, NCAPG, NCAPH, RACGAP1, KIF23, INCENP, NCAPD2, NDC80, AURKB, BUB1                                                                                                                                                |
| Mitotic Metaphase and Anaphase              | 171                 | 17                    | 1.51E-08 | CDC20, PSME2, PLK1, NUF2, INCENP, PSMB8, CENPL, SPC24, SPC25, PTTG1, VRK1, UBE2C, NDC80, ESPL1, PSMB10, AURKB, BUB1                                                                                                    |
| Cell Cycle Checkpoints                      | 246                 | 20                    | 2.15E-08 | CDC20, PSME2, PLK1, NUF2, INCENP, WRN, PSMB8, CENPL, SPC24, SPC25, CCNB2, UBE2C, NDC80, CDK1, MCM10, MCM5, MCM6, PSMB10, AURKB, BUB1                                                                                   |
| TCR signaling in naïve CD4+ T cells         | 67                  | 11                    | 4.41E-08 | PRKCB, HLA-DRB1, CD3D, MAP4K1, VAV1, CD86, CD80, CARD11, PTPRC, CSK, PTPN6                                                                                                                                             |
| Neutrophil degranulation                    | 418                 | 24                    | 4.92E-07 | TBC1D10C, UNC13D, BIN2, NCKAP1L, LYZ, ARHGAP9, LPCAT1, CTSS, CD33, CD53, TUBB, LAIR1, COTL1, CYBB, CYBA, PTPRC, SELL, ITGB2, LRMP, ITGAL, ITGAX, KCNAB2, FGR, PTPN6                                                    |
| TCR signaling in naïve CD8+ T cells         | 54                  | 9                     | 6.72E-07 | PRKCB, CD3D, VAV1, CD86, CD80, CARD11, PTPRC, CSK, PTPN6                                                                                                                                                               |
| PLK1 signaling events                       | 44                  | 8                     | 1.50E-06 | CDC20, PLK1, INCENP, SPC24, ECT2, NDC80, CDK1, BUB1                                                                                                                                                                    |
| Interleukin-10 signaling                    | 47                  | 8                     | 2.43E-06 | CCR5, IL18, CCL19, CCL20, CD86, CD80, CXCL10, CCL5                                                                                                                                                                     |
| Cell cycle Regulation of mitotic cell cycle | 124                 | 12                    | 2.77E-06 | CDC20, PLK1, CCND2, PTTG1, CCNB2, CDK1, CCNA2, ESPL1, MCM5, MCM6, E2F1, BUB1                                                                                                                                           |
|                                             | 83                  | 10                    | 2.89E-06 | CDC20, PSME2, PLK1, PSMB8, PTTG1, NEK2, UBE2C, CDK1, PSMB10, AURKB                                                                                                                                                     |
| Rheumatoid arthritis                        | 90                  | 10                    | 5.84E-06 | HLA-DRB1, IL18, CCL20, CD86, CD80, ITGB2, ITGAL, ACP5, LTB, CCL5                                                                                                                                                       |
| Interferon gamma signaling                  | 73                  | 9                     | 7.60E-06 | TRIM22, HLA-DRB1, CIITA, OASL, OAS1, GBP1, PML, PTPN6, TRIM34                                                                                                                                                          |
| Costimulation by the CD28 family            | 65                  | 8                     | 2.48E-05 | HLA-DRB1, CD3D, VAV1, CD86, CD80, TNFRSF14, CSK, PTPN6                                                                                                                                                                 |

**Biological Pathway (GO), FDR < 0.001**

| Gene Set                  | Proteins in geneset | Proteins from network | P-Value  | Nodes                                                                                                                                                             |
|---------------------------|---------------------|-----------------------|----------|-------------------------------------------------------------------------------------------------------------------------------------------------------------------|
| cell division             | 314                 | 24                    | 2.59E-09 | CCNF, CDC20, CDCA3, NCAPG, SKA3, NCAPH, TUBA1B, NUF2, TUBB, MIS18A, NCAPD2, SPC24, SPC25, CCND2, PTTG1, NEK2, VRK1, CCNB2, UBE2C, NDC80, CDK1, CCNA2, BUB1, SPAG5 |
| defense response to virus | 164                 | 16                    | 5.29E-08 | TRIM22, UNC13D, APOBEC3H, IFIH1, TLR8, PMAIP1, ISG20, CXCL10, PTPRC, OASL, DTX3L, OAS1, GBP1, MX2, PML, TRIM34                                                    |



|                                                                 |     |    |          |                                                                                                                                                                     |
|-----------------------------------------------------------------|-----|----|----------|---------------------------------------------------------------------------------------------------------------------------------------------------------------------|
| positive regulation of T cell migration                         | 11  | 6  | 5.92E-08 | AIF1, CCL20, CXCL10, DOCK8, ITGA4, CCL5                                                                                                                             |
| chromosome segregation                                          | 57  | 10 | 9.96E-08 | ESCO2, SKA3, TOP2A, NUF2, INCENP, MIS18A, SPC25, NEK2, NDC80, SPAG5                                                                                                 |
| mitotic cytokinesis                                             | 36  | 8  | 3.37E-07 | STMN1, RACGAP1, PLK1, UNC119, KIF23, NUSAP1, ECT2, KIF4A                                                                                                            |
| neutrophil degranulation                                        | 420 | 24 | 5.48E-07 | TBC1D10C, UNC13D, BIN2, NCKAP1L, LYZ, ARHGAP9, LPCAT1, CTSS, CD33, CD53, TUBB, LAIR1, COTL1, CYBB, CYBA, PTPRC, SELL, ITGB2, LRMP, ITGAL, ITGAX, KCNAB2, FGR, PTPN6 |
| T cell costimulation                                            | 74  | 10 | 1.05E-06 | HLA-DRB1, CD3D, VAV1, CCL19, CD86, CD80, CARD11, TNFRSF14, CSK, PTPN6                                                                                               |
| immune response                                                 | 349 | 21 | 1.31E-06 | IL27RA, TRIM22, TNFSF9, TNFSF8, CTSS, CCR5, MAP4K2, IL18, VAV1, CCL19, CCL20, C1QC, CD86, GPR65, NCF4, TNFRSF14, CXCL10, CIITA, FASLG, LTB, SEMA4D                  |
| mitotic sister chromatid segregation                            | 19  | 6  | 1.40E-06 | PLK1, NUSAP1, NEK2, NDC80, ESPL1, SPAG5                                                                                                                             |
| positive regulation of GTPase activity                          | 294 | 19 | 1.54E-06 | PREX1, RACGAP1, NCKAP1L, EZH2, ARHGAP9, GMIP, VAV1, CCL19, CCL20, FAM13B, ARHGDIB, ARHGAP15, ECT2, ARHGAP30, DOCK8, TAGAP, CCL5, SEMA4D, RGS10                      |
| regulation of small GTPase mediated signal transduction         | 140 | 13 | 1.66E-06 | PREX1, RACGAP1, ARHGAP9, RHOH, GMIP, VAV1, FGD3, FAM13B, ARHGDIB, ARHGAP15, ECT2, ARHGAP30, TAGAP                                                                   |
| T cell differentiation                                          | 31  | 7  | 1.67E-06 | PREX1, GPR18, CD3D, RHOH, VAV1, PTPRC, PIK3CD                                                                                                                       |
| response to virus                                               | 103 | 11 | 2.87E-06 | STMN1, TRIM22, IFIH1, TLR8, CCL19, ISG20, OASL, FGR, OAS1, CCL5, MX2                                                                                                |
| innate immune response                                          | 408 | 22 | 4.21E-06 | APOBEC3H, SH2D1A, MARCO, REL, IFIH1, MAP4K2, TLR8, C1QB, C1QC, SLA, CYBB, CYBA, CORO1A, HMGB2, PIK3CD, CASP4, DTX3L, FGR, TRIM59, CSK, MX2, PML                     |
| regulation of attachment of spindle microtubules to kinetochore | 6   | 4  | 4.70E-06 | RACGAP1, NEK2, ECT2, SPAG5                                                                                                                                          |
| positive regulation of T cell proliferation                     | 53  | 8  | 5.76E-06 | NCKAP1L, AIF1, CCL19, CARD11, CORO1A, PTPRC, SASH3, CCL5                                                                                                            |

**Cell Component (GO), FDR < 0.001**

| Gene Set            | Proteins in geneset | Proteins from network | P-Value  | Nodes                                                                                                                                                                                                                                                                                                                                                                                                                                                                                                                                                                                                                                                                                                                                                 |
|---------------------|---------------------|-----------------------|----------|-------------------------------------------------------------------------------------------------------------------------------------------------------------------------------------------------------------------------------------------------------------------------------------------------------------------------------------------------------------------------------------------------------------------------------------------------------------------------------------------------------------------------------------------------------------------------------------------------------------------------------------------------------------------------------------------------------------------------------------------------------|
| Ndc80 complex       | 4                   | 4                     | 9.50E-07 | NUF2, SPC24, SPC25, NDC80                                                                                                                                                                                                                                                                                                                                                                                                                                                                                                                                                                                                                                                                                                                             |
| midbody             | 119                 | 12                    | 1.80E-06 | RACGAP1, RAB11FIP4, PLK1, KIF23, INCENP, NEK2, ECT2, KIF4A, CDK1, AURKB, SPAG5, SHCBP1                                                                                                                                                                                                                                                                                                                                                                                                                                                                                                                                                                                                                                                                |
| spindle microtubule | 36                  | 7                     | 4.38E-06 | SKA3, PLK1, NUSAP1, KIF4A, CDK1, AURKB, SPAG5                                                                                                                                                                                                                                                                                                                                                                                                                                                                                                                                                                                                                                                                                                         |
|                     |                     |                       |          | CYFIP2, LRR1, CCNF, ENO2, IKZF3, CDC20, PREX1, STMN1, TBC1D10C, TRIM22, PRKCB, UNC13D, PSME2, PRKD2, SKAP1, IDO1, CDCA3, NCAPG, NCAPH, RACGAP1, NCKAP1L, SH2D1A, PLK1, REL, UNC119, DENND1C, ARHGAP9, KIF15, IFIH1, NUF2, DLGAP5, IL18, RHOH, KIF23, GMIP, VAV1, APBB1IP, INCENP, HCLS1, PLCB2, DCP2, AIF1, FGD3, PSMB8, MIS18A, CENPL, NCAPD2, SPC24, CDKN3, SPC25, FAM13B, NCF4, CCND2, PTTG1, ARHGDIB, NEK2, VRK1, CARD11, DAPP1, ARHGAP15, CORO1A, CCNB2, PMAIP1, ECT2, RARRES3, UBE2C, ARPC4, NDC80, ARHGAP30, KIF4A, CDK1, DOCK8, PIK3CD, OASL, CASP8, CASP4, TAGAP, ACP5, DTX3L, KCNAB2, CCNA2, FGR, HSH2D, OAS1, ESPL1, MCM5, LCP1, BIRC3, PSMB10, AURKB, CSK, GBP1, BUB1, MX2, CEP152, PML, FMNL1, RAD51, RGS10, TRIM37, PTPN6, PFKP, TRIM34 |
| cytosol             | 4087                | 103                   | 9.38E-06 |                                                                                                                                                                                                                                                                                                                                                                                                                                                                                                                                                                                                                                                                                                                                                       |

|                                           |    |   |          |                                                            |
|-------------------------------------------|----|---|----------|------------------------------------------------------------|
| tertiary granule<br>membrane              | 59 | 8 | 1.23E-05 | CD33, CD53, LAIR1, CYBB, CYBA, ITGB2, ITGAX, KCNAB2        |
| condensed<br>chromosome                   | 81 | 9 | 1.69E-05 | PHF6, NUF2, INCENP, SPC24, SPC25, NEK2, NDC80, BUB1, SPAG5 |
| kinetochore<br>centralspindlin<br>complex | 3  | 3 | 2.34E-05 | RACGAP1, KIF23, ECT2                                       |

**Supplemental  
Table S4**

| cluster number | cluster color | gene count | protein name | protein identifier      | protein description                                                                                                                                                                                                                                                                                                                                                                                                                                                                                                                                                                                                           |
|----------------|---------------|------------|--------------|-------------------------|-------------------------------------------------------------------------------------------------------------------------------------------------------------------------------------------------------------------------------------------------------------------------------------------------------------------------------------------------------------------------------------------------------------------------------------------------------------------------------------------------------------------------------------------------------------------------------------------------------------------------------|
| 1              | Red           | 88         | KCNA3        | 9615.ENSCAFP00000031052 | Potassium voltage-gated channel, shaker-related subfamily, member 3                                                                                                                                                                                                                                                                                                                                                                                                                                                                                                                                                           |
| 1              | Red           | 88         | CCL20        | 9615.ENSCAFP00000015443 | C-C motif chemokine 20 precursor                                                                                                                                                                                                                                                                                                                                                                                                                                                                                                                                                                                              |
| 1              | Red           | 88         | IL27RA       | 9615.ENSCAFP00000024279 | Interleukin 27 receptor, alpha                                                                                                                                                                                                                                                                                                                                                                                                                                                                                                                                                                                                |
| 1              | Red           | 88         | PTPRC        | 9615.ENSCAFP00000016636 | Protein tyrosine phosphatase, receptor type, C                                                                                                                                                                                                                                                                                                                                                                                                                                                                                                                                                                                |
| 1              | Red           | 88         | CORO1A       | 9615.ENSCAFP00000025203 | Coronin, actin binding protein, 1A                                                                                                                                                                                                                                                                                                                                                                                                                                                                                                                                                                                            |
| 1              | Red           | 88         | SPOCK2       | 9615.ENSCAFP00000021263 | Sparc/osteonectin, cwcv and kazal-like domains proteoglycan (testican) 2                                                                                                                                                                                                                                                                                                                                                                                                                                                                                                                                                      |
| 1              | Red           | 88         | CSK          | 9615.ENSCAFP00000026494 | C-src tyrosine kinase                                                                                                                                                                                                                                                                                                                                                                                                                                                                                                                                                                                                         |
| 1              | Red           | 88         | TRAF3IP3     | 9615.ENSCAFP00000017575 | TRAF3 interacting protein 3                                                                                                                                                                                                                                                                                                                                                                                                                                                                                                                                                                                                   |
| 1              | Red           | 88         | MIS18A**     | 9615.ENSCAFP00000037287 | MIS18 kinetochore protein homolog A (S. pombe)                                                                                                                                                                                                                                                                                                                                                                                                                                                                                                                                                                                |
| 1              | Red           | 88         | GMFB         | 9615.ENSCAFP00000037078 | Glia maturation factor, beta                                                                                                                                                                                                                                                                                                                                                                                                                                                                                                                                                                                                  |
| 1              | Red           | 88         | SHCBP1       | 9615.ENSCAFP00000005520 | SHC SH2-domain binding protein 1                                                                                                                                                                                                                                                                                                                                                                                                                                                                                                                                                                                              |
| 1              | Red           | 88         | PARVG        | 9615.ENSCAFP00000001248 | Parvin, gamma                                                                                                                                                                                                                                                                                                                                                                                                                                                                                                                                                                                                                 |
| 1              | Red           | 88         | ADAMDEC1     | 9615.ENSCAFP00000013336 | ADAM-like, decysin 1                                                                                                                                                                                                                                                                                                                                                                                                                                                                                                                                                                                                          |
| 1              | Red           | 88         | SPIC         | 9615.ENSCAFP00000010400 | Spi-C transcription factor (Spi-1/PU.1 related)                                                                                                                                                                                                                                                                                                                                                                                                                                                                                                                                                                               |
| 1              | Red           | 88         | C1QC         | 9615.ENSCAFP00000021580 | Complement component 1, q subcomponent, C chain                                                                                                                                                                                                                                                                                                                                                                                                                                                                                                                                                                               |
| 1              | Red           | 88         | APBB1IP      | 9615.ENSCAFP00000006427 | Amyloid beta (A4) precursor protein-binding, family B, member 1 interacting protein                                                                                                                                                                                                                                                                                                                                                                                                                                                                                                                                           |
| 1              | Red           | 88         | GPR65        | 9615.ENSCAFP00000025551 | G protein-coupled receptor 65<br>Baculoviral IAP repeat-containing protein 3; Multi-functional protein which regulates not only caspases and apoptosis, but also modulates inflammatory signaling and immunity, mitogenic kinase signaling and cell proliferation, as well as cell invasion and metastasis. Acts as an E3 ubiquitin- protein ligase regulating NF-kappa-B signaling and regulates both canonical and non-canonical NF-kappa-B signaling by acting in opposite directions: acts as a positive regulator of the canonical pathway and suppresses constitutive activation of non-canonical NF-kappa-B signaling. |
| 1              | Red           | 88         | BIRC3        | 9615.ENSCAFP00000022282 |                                                                                                                                                                                                                                                                                                                                                                                                                                                                                                                                                                                                                               |
| 1              | Red           | 88         | COTL1        | 9615.ENSCAFP00000039200 | Coactosin-like 1 (Dictyostelium)                                                                                                                                                                                                                                                                                                                                                                                                                                                                                                                                                                                              |
| 1              | Red           | 88         | CD83         | 9615.ENSCAFP00000041045 | CD83 molecule                                                                                                                                                                                                                                                                                                                                                                                                                                                                                                                                                                                                                 |
| 1              | Red           | 88         | REL          | 9615.ENSCAFP00000004425 | V-rel reticuloendotheliosis viral oncogene homolog (avian)                                                                                                                                                                                                                                                                                                                                                                                                                                                                                                                                                                    |
| 1              | Red           | 88         | CTSS         | 9615.ENSCAFP00000017782 | Cathepsin S precursor ; Thiol protease. Key protease responsible for the removal of the invariant chain from MHC class II molecules. The bond- specificity of this proteinase is in part similar to the specificities of cathepsin L and cathepsin N.                                                                                                                                                                                                                                                                                                                                                                         |
| 1              | Red           | 88         | FERMT3       | 9615.ENSCAFP00000021567 | Fermitin family member 3                                                                                                                                                                                                                                                                                                                                                                                                                                                                                                                                                                                                      |

|   |     |    |          |                          |                                                                                                                                                                                                                                                                                                                                                                                                                                               |
|---|-----|----|----------|--------------------------|-----------------------------------------------------------------------------------------------------------------------------------------------------------------------------------------------------------------------------------------------------------------------------------------------------------------------------------------------------------------------------------------------------------------------------------------------|
| 1 | Red | 88 | PMAIP1   | 9615.ENSCAFP00000032282  | Phorbol-12-myristate-13-acetate-induced protein 1 ; Promotes activation of caspases and apoptosis. Promotes mitochondrial membrane changes and efflux of apoptogenic proteins from the mitochondria. Contributes to p53/TP53-dependent apoptosis after radiation exposure. Promotes proteasomal degradation of MCL1. Competes with BAK1 and with BIM/BCL2L11 for binding to MCL1; can displace BAK1 and BIM/BCL2L11 from their binding sites. |
| 1 | Red | 88 | IL18     | 9615.ENSCAFP00000038185  | Interleukin-18 precursor ; Augments natural killer cell activity in spleen cells and stimulates interferon gamma production in T-helper type I cells                                                                                                                                                                                                                                                                                          |
| 1 | Red | 88 | CD69     | 9615.ENSCAFP00000020010  | CD69 molecule                                                                                                                                                                                                                                                                                                                                                                                                                                 |
| 1 | Red | 88 | TNFRSF14 | 9615.ENSCAFP00000028709  | Tumor necrosis factor receptor superfamily, member 14                                                                                                                                                                                                                                                                                                                                                                                         |
| 1 | Red | 88 | CD74     | 9615.ENSCAFP00000026761  | CD74 molecule, major histocompatibility complex, class II invariant chain                                                                                                                                                                                                                                                                                                                                                                     |
| 1 | Red | 88 | CASP4    | 9615.ENSCAFP00000021900  | Caspase-1 ; Thiol protease that cleaves IL-1 beta between an Asp and an Ala, releasing the mature cytokine which is involved in a variety of inflammatory processes. Important for defense against pathogens. Cleaves and activates sterol regulatory element binding proteins (SREBPs). Can also promote apoptosis.                                                                                                                          |
| 1 | Red | 88 | MARCO    | 9615.ENSCAFP00000007326  | Macrophage receptor with collagenous structure                                                                                                                                                                                                                                                                                                                                                                                                |
| 1 | Red | 88 | SKAP1    | 9615.ENSCAFP00000024759  | Src kinase associated phosphoprotein 1                                                                                                                                                                                                                                                                                                                                                                                                        |
| 1 | Red | 88 | FAM49A   | 9615.ENSCAFP00000005546  | Family with sequence similarity 49, member A                                                                                                                                                                                                                                                                                                                                                                                                  |
| 1 | Red | 88 | P2RY10   | 9615.ENSCAFP00000025475  | Purinergic receptor P2Y, G-protein coupled, 10                                                                                                                                                                                                                                                                                                                                                                                                |
| 1 | Red | 88 | C1QB     | 9615.ENSCAFP00000039386  | Complement component 1, q subcomponent, B chain                                                                                                                                                                                                                                                                                                                                                                                               |
| 1 | Red | 88 | LYZ      | 9615.ENSCAFP00000000619  | Lysozyme C, spleen isozyme ; Lysozymes have primarily a bacteriolytic function; those in tissues and body fluids are associated with the monocyte- macrophage system and enhance the activity of immunoagents                                                                                                                                                                                                                                 |
| 1 | Red | 88 | STK17B   | 9615.ENSCAFP00000015677  | Serine/threonine kinase 17b                                                                                                                                                                                                                                                                                                                                                                                                                   |
| 1 | Red | 88 | CXCL10   | 9615.ENSCAFP00000032015  | C-X-C motif chemokine 10 ; Chemotactic for monocytes and T-lymphocytes. Binds to CXCR3 (By similarity)                                                                                                                                                                                                                                                                                                                                        |
| 1 | Red | 88 | PRKD2    | 9615.ENSCAFP00000006334  | Protein kinase D2                                                                                                                                                                                                                                                                                                                                                                                                                             |
| 1 | Red | 88 | CARD11   | 9615.ENSCAFP00000023996  | Caspase recruitment domain family, member 11                                                                                                                                                                                                                                                                                                                                                                                                  |
| 1 | Red | 88 | DLA-DRA  | 9615.ENSCAFP00000001147  | MHC class II DR alpha chain precursor                                                                                                                                                                                                                                                                                                                                                                                                         |
| 1 | Red | 88 | SKA3**   | 9615.ENSCAFP00000036892  | Spindle and kinetochore associated complex subunit 3; Ska3 promotes chromosome association of the anaphase-promoting complex.                                                                                                                                                                                                                                                                                                                 |
| 1 | Red | 88 | PARP12   | 9615.ENSCAFP00000005924  | Poly (ADP-ribose) polymerase family, member 12                                                                                                                                                                                                                                                                                                                                                                                                |
| 1 | Red | 88 | BCL2A1   | 9615.ENSCAFP00000020596  | BCL2-related protein A1                                                                                                                                                                                                                                                                                                                                                                                                                       |
| 1 | Red | 88 | LRRC46   | 9615.ENSCAFP000000042601 | Leucine rich repeat containing 46                                                                                                                                                                                                                                                                                                                                                                                                             |
| 1 | Red | 88 | CIITA    | 9615.ENSCAFP00000027952  | Class II, major histocompatibility complex, transactivator                                                                                                                                                                                                                                                                                                                                                                                    |
| 1 | Red | 88 | CCR5     | 9615.ENSCAFP00000020323  | C-C chemokine receptor type 5 ; Receptor for a number of inflammatory CC-chemokines including MIP-1-alpha, MIP-1-beta and RANTES and subsequently transduces a signal by increasing the intracellular calcium ion level. May play a role in the control of granulocytic lineage proliferation or differentiation.                                                                                                                             |
| 1 | Red | 88 | MAP4K2   | 9615.ENSCAFP00000020961  | Mitogen-activated protein kinase kinase kinase kinase 2                                                                                                                                                                                                                                                                                                                                                                                       |
| 1 | Red | 88 | IFIH1    | 9615.ENSCAFP00000015359  | Interferon induced with helicase C domain 1                                                                                                                                                                                                                                                                                                                                                                                                   |

|   |     |    |          |                         |                                                                                                                                                                                                                                                                                                                                                                                                                                                                                                                                                                                                                                                           |
|---|-----|----|----------|-------------------------|-----------------------------------------------------------------------------------------------------------------------------------------------------------------------------------------------------------------------------------------------------------------------------------------------------------------------------------------------------------------------------------------------------------------------------------------------------------------------------------------------------------------------------------------------------------------------------------------------------------------------------------------------------------|
| 1 | Red | 88 | EBI3     | 9615.ENSCAFP00000028203 | Epstein-Barr virus induced 3                                                                                                                                                                                                                                                                                                                                                                                                                                                                                                                                                                                                                              |
| 1 | Red | 88 | MST4     | 9615.ENSCAFP00000027770 | Uncharacterized protein                                                                                                                                                                                                                                                                                                                                                                                                                                                                                                                                                                                                                                   |
| 1 | Red | 88 | LAPTM5   | 9615.ENSCAFP00000016550 | Lysosomal protein transmembrane 5                                                                                                                                                                                                                                                                                                                                                                                                                                                                                                                                                                                                                         |
| 1 | Red | 88 | HLA-DRB1 | 9615.ENSCAFP00000001156 | DLA class II histocompatibility antigen, DR-1 beta chain precursor                                                                                                                                                                                                                                                                                                                                                                                                                                                                                                                                                                                        |
| 1 | Red | 88 | ESCO2*   | 9615.ENSCAFP00000012307 | Establishment of cohesion 1 homolog 2 (S. cerevisiae)                                                                                                                                                                                                                                                                                                                                                                                                                                                                                                                                                                                                     |
| 1 | Red | 88 | LAIR1    | 9615.ENSCAFP00000003873 | Leukocyte-associated immunoglobulin-like receptor 1<br>Potassium voltage-gated channel subfamily A member 2 ; Voltage-gated potassium channel that mediates transmembrane potassium transport in excitable membranes, primarily in the brain and the central nervous system, but also in the cardiovascular system. Prevents aberrant action potential firing and regulates neuronal output. Forms tetrameric potassium-selective channels through which potassium ions pass in accordance with their electrochemical gradient. The channel alternates between opened and closed conformations in response to the voltage difference across the Membrane. |
| 1 | Red | 88 | KCNA2    | 9615.ENSCAFP00000029266 |                                                                                                                                                                                                                                                                                                                                                                                                                                                                                                                                                                                                                                                           |
| 1 | Red | 88 | CKAP2L   | 9615.ENSCAFP00000032225 | Cytoskeleton associated protein 2-like                                                                                                                                                                                                                                                                                                                                                                                                                                                                                                                                                                                                                    |
| 1 | Red | 88 | MAP4K1   | 9615.ENSCAFP00000008819 | Mitogen-activated protein kinase kinase kinase kinase 1                                                                                                                                                                                                                                                                                                                                                                                                                                                                                                                                                                                                   |
| 1 | Red | 88 | KCNA6    | 9615.ENSCAFP00000040687 | Uncharacterized protein                                                                                                                                                                                                                                                                                                                                                                                                                                                                                                                                                                                                                                   |
| 1 | Red | 88 | ITGA4    | 9615.ENSCAFP00000020903 | Integrin, alpha 4 (antigen CD49D, alpha 4 subunit of VLA-4 receptor)                                                                                                                                                                                                                                                                                                                                                                                                                                                                                                                                                                                      |
| 1 | Red | 88 | TRIM59   | 9615.ENSCAFP00000042145 | Tripartite motif containing 59                                                                                                                                                                                                                                                                                                                                                                                                                                                                                                                                                                                                                            |
| 1 | Red | 88 | CD48     | 9615.ENSCAFP00000040985 | CD48 molecule                                                                                                                                                                                                                                                                                                                                                                                                                                                                                                                                                                                                                                             |
| 1 | Red | 88 | HCLS1    | 9615.ENSCAFP00000017015 | Hematopoietic cell-specific Lyn substrate 1                                                                                                                                                                                                                                                                                                                                                                                                                                                                                                                                                                                                               |
| 1 | Red | 88 | GZMK     | 9615.ENSCAFP00000027147 | Granzyme K (granzyme 3; tryptase II)                                                                                                                                                                                                                                                                                                                                                                                                                                                                                                                                                                                                                      |
| 1 | Red | 88 | PLCB2    | 9615.ENSCAFP00000013316 | Phospholipase C, beta 2                                                                                                                                                                                                                                                                                                                                                                                                                                                                                                                                                                                                                                   |
| 1 | Red | 88 | CCL19    | 9615.ENSCAFP00000002873 | C-C motif chemokine 19 precursor                                                                                                                                                                                                                                                                                                                                                                                                                                                                                                                                                                                                                          |
| 1 | Red | 88 | LTB      | 9615.ENSCAFP00000039920 | Lymphotoxin-beta                                                                                                                                                                                                                                                                                                                                                                                                                                                                                                                                                                                                                                          |
| 1 | Red | 88 | GPR18    | 9615.ENSCAFP00000035502 | G protein-coupled receptor 18                                                                                                                                                                                                                                                                                                                                                                                                                                                                                                                                                                                                                             |
| 1 | Red | 88 | TF       | 9615.ENSCAFP00000009883 | Transferrin                                                                                                                                                                                                                                                                                                                                                                                                                                                                                                                                                                                                                                               |
| 1 | Red | 88 | DTX3L    | 9615.ENSCAFP00000017579 | Deltex 3-like (Drosophila)                                                                                                                                                                                                                                                                                                                                                                                                                                                                                                                                                                                                                                |
| 1 | Red | 88 | FASLG    | 9615.ENSCAFP00000021643 | Uncharacterized protein<br>C-C motif chemokine 5 precursor ; Chemoattractant for blood monocytes, memory T-helper cells and eosinophils. Causes the release of histamine from basophils and activates eosinophils. May activate several chemokine receptors including CCR1, CCR3, CCR4 and CCR5. May also be an agonist of the G protein-coupled receptor GPR75. Together with GPR75, may play a role in neuron survival through activation of a downstream signaling pathway involving the PI3, Akt and MAP kinases. By activating GPR75 may also play a role in insulin secretion by islet cells                                                        |
| 1 | Red | 88 | CCL5     | 9615.ENSCAFP00000026835 |                                                                                                                                                                                                                                                                                                                                                                                                                                                                                                                                                                                                                                                           |
| 1 | Red | 88 | SLA      | 9615.ENSCAFP00000001590 | Src-like-adaptor                                                                                                                                                                                                                                                                                                                                                                                                                                                                                                                                                                                                                                          |

|   |        |    |          |                         |                                                                                                                                                                                                                                 |
|---|--------|----|----------|-------------------------|---------------------------------------------------------------------------------------------------------------------------------------------------------------------------------------------------------------------------------|
| 1 | Red    | 88 | LRRC8D   | 9615.ENSCAFP00000029954 | Leucine rich repeat containing 8 family, member D                                                                                                                                                                               |
| 1 | Red    | 88 | CD53     | 9615.ENSCAFP00000029263 | CD53 molecule                                                                                                                                                                                                                   |
| 1 | Red    | 88 | LCP1     | 9615.ENSCAFP00000035137 | Lymphocyte cytosolic protein 1 (L-plastin)                                                                                                                                                                                      |
| 1 | Red    | 88 | SH2D1A   | 9615.ENSCAFP00000041409 | SH2 domain containing 1A                                                                                                                                                                                                        |
| 1 | Red    | 88 | SELL     | 9615.ENSCAFP00000022356 | Selectin L; Cell surface adhesion protein. Mediates the adherence of lymphocytes to endothelial cells of high endothelial venules in peripheral lymph nodes. Promotes initial tethering and rolling of leukocytes in endothelia |
| 1 | Red    | 88 | ITGAX    | 9615.ENSCAFP00000024841 | Integrin, alpha X (complement component 3 receptor 4 subunit)                                                                                                                                                                   |
| 1 | Red    | 88 | ENPP3    | 9615.ENSCAFP00000000528 | Ectonucleotide pyrophosphatase/phosphodiesterase 3                                                                                                                                                                              |
| 1 | Red    | 88 | HS3ST3A1 | 9615.ENSCAFP00000026405 | Heparan sulfate (glucosamine) 3-O-sulfotransferase 3A1                                                                                                                                                                          |
| 1 | Red    | 88 | NIPA1    | 9615.ENSCAFP00000014331 | Non imprinted in Prader-Willi/Angelman syndrome 1                                                                                                                                                                               |
| 1 | Red    | 88 | CD2      | 9615.ENSCAFP00000014445 | CD2 molecule                                                                                                                                                                                                                    |
| 1 | Red    | 88 | FYB      | 9615.ENSCAFP00000035897 | FYN binding protein                                                                                                                                                                                                             |
| 1 | Red    | 88 | CAMK1D   | 9615.ENSCAFP00000007134 | Calcium/calmodulin-dependent protein kinase ID                                                                                                                                                                                  |
| 1 | Red    | 88 | ARPC4    | 9615.ENSCAFP00000007935 | Actin related protein 2/3 complex, subunit 4, 20kDa                                                                                                                                                                             |
| 1 | Red    | 88 | IDO1     | 9615.ENSCAFP00000008594 | Indoleamine 2,3-dioxygenase 1                                                                                                                                                                                                   |
| 1 | Red    | 88 | MXD3     | 9615.ENSCAFP00000024190 | MAX dimerization protein 3                                                                                                                                                                                                      |
| 1 | Red    | 88 | CASP12   | 9615.ENSCAFP00000038116 | Caspase-12 ; Involved in the activation cascade of caspases responsible for apoptosis execution                                                                                                                                 |
| 2 | Yellow | 37 | CCNF*    | 9615.ENSCAFP00000028622 | Cyclin F                                                                                                                                                                                                                        |
|   | Yellow | 37 | AURKB*   | 9615.ENSCAFP00000025043 | Aurora kinase B                                                                                                                                                                                                                 |
| 2 | Yellow | 37 | CDCA3*   | 9615.ENSCAFP00000021602 | F-box-like protein which is required for entry into mitosis                                                                                                                                                                     |
| 2 | Yellow | 37 | CCNA2*   | 9615.ENSCAFP00000006129 | Cyclin A2                                                                                                                                                                                                                       |
| 2 | Yellow | 37 | CENPL**  | 9615.ENSCAFP00000021422 | Centromere protein L                                                                                                                                                                                                            |
| 2 | Yellow | 37 | TUBB     | 9615.ENSCAFP00000000649 | Tubulin, beta class I; Tubulin is the major constituent of microtubules. It binds two moles of GTP, one at an exchangeable site on the beta chain and one at a non-exchangeable site on the alpha chain                         |
| 2 | Yellow | 37 | EZH2     | 9615.ENSCAFP00000005090 | Enhancer of zeste homolog 2 (Drosophila)                                                                                                                                                                                        |
| 2 | Yellow | 37 | KIF15*?  | 9615.ENSCAFP00000020805 | Kinesin family member 15                                                                                                                                                                                                        |
| 2 | Yellow | 37 | HMGB2    | 9615.ENSCAFP00000011606 | High mobility group box 2                                                                                                                                                                                                       |
| 2 | Yellow | 37 | CEP152** | 9615.ENSCAFP00000038873 | Centrosomal protein 152kDa                                                                                                                                                                                                      |
| 2 | Yellow | 37 | PTTG1*   | 9615.ENSCAFP00000043220 | Pituitary tumor-transforming 1                                                                                                                                                                                                  |
| 2 | Yellow | 37 | NUF2**   | 9615.ENSCAFP00000019550 | NUF2, NDC80 kinetochore complex component, homolog (S. cerevisiae)                                                                                                                                                              |

|   |        |    |           |                         |                                                                                                                                                                                                                                                                                                                                                                                                                                                                                       |
|---|--------|----|-----------|-------------------------|---------------------------------------------------------------------------------------------------------------------------------------------------------------------------------------------------------------------------------------------------------------------------------------------------------------------------------------------------------------------------------------------------------------------------------------------------------------------------------------|
| 2 | Yellow | 37 | OAS1      | 9615.ENSCAFP00000013118 | 2'-5'-oligoadenylate synthase 1                                                                                                                                                                                                                                                                                                                                                                                                                                                       |
| 2 | Yellow | 37 | SPC25**   | 9615.ENSCAFP00000017454 | SPC25, NDC80 kinetochore complex component, homolog (S. cerevisiae)<br>Proteasome (prosome, macropain) subunit, beta type, 10; The proteasome is a multicatalytic proteinase complex which is characterized by its ability to cleave peptides with Arg, Phe, Tyr, Leu, and Glu adjacent to the leaving group at neutral or slightly basic pH. The proteasome has an ATP-dependent proteolytic activity                                                                                |
| 2 | Yellow | 37 | PSMB10    | 9615.ENSCAFP00000030153 |                                                                                                                                                                                                                                                                                                                                                                                                                                                                                       |
| 2 | Yellow | 37 | VRK1      | 9615.ENSCAFP00000026262 | Vaccinia related kinase 1                                                                                                                                                                                                                                                                                                                                                                                                                                                             |
| 2 | Yellow | 37 | CDC20*    | 9615.ENSCAFP00000007875 | Cell division cycle 20 homolog (S. cerevisiae)                                                                                                                                                                                                                                                                                                                                                                                                                                        |
| 2 | Yellow | 37 | NEK2*/**  | 9615.ENSCAFP00000032514 | NIMA-related kinase 2<br>Tubulin, alpha 1b; Tubulin is the major constituent of microtubules. It binds two moles of GTP, one at an exchangeable site on the beta chain and one at a non-exchangeable site on the alpha chain                                                                                                                                                                                                                                                          |
| 2 | Yellow | 37 | TUBA1B    | 9615.ENSCAFP00000012688 |                                                                                                                                                                                                                                                                                                                                                                                                                                                                                       |
| 2 | Yellow | 37 | INCENP**  | 9615.ENSCAFP00000023376 | Inner centromere protein antigens 135/155kDa                                                                                                                                                                                                                                                                                                                                                                                                                                          |
| 2 | Yellow | 37 | CCNB2*    | 9615.ENSCAFP00000024416 | Cyclin B2                                                                                                                                                                                                                                                                                                                                                                                                                                                                             |
| 2 | Yellow | 37 | MLF1IP**  | 9615.ENSCAFP00000011465 | MLF1 interacting protein; also called CENPU, required for centromere assembly                                                                                                                                                                                                                                                                                                                                                                                                         |
| 2 | Yellow | 37 | CASP8     | 9615.ENSCAFP00000017899 | Caspase-8                                                                                                                                                                                                                                                                                                                                                                                                                                                                             |
| 2 | Yellow | 37 | SGOL1*/** | 9615.ENSCAFP00000008681 | Shugoshin-like 1 (S. pombe)<br>Proteasome subunit beta type-8 ; The proteasome is a multicatalytic proteinase complex which is characterized by its ability to cleave peptides with Arg, Phe, Tyr, Leu, and Glu adjacent to the leaving group at neutral or slightly basic pH. The proteasome has an ATP-dependent proteolytic activity. This subunit is involved in antigen processing to generate class I binding peptides (By similarity). Required for adipocyte differentiation. |
| 2 | Yellow | 37 | PSMB8     | 9615.ENSCAFP00000001185 |                                                                                                                                                                                                                                                                                                                                                                                                                                                                                       |
| 2 | Yellow | 37 | PSME2     | 9615.ENSCAFP00000017612 | Proteasome (prosome, macropain) activator subunit 2 (PA28 beta)                                                                                                                                                                                                                                                                                                                                                                                                                       |
| 2 | Yellow | 37 | BUB1**    | 9615.ENSCAFP00000037890 | Budding uninhibited by benzimidazoles 1 homolog (yeast)                                                                                                                                                                                                                                                                                                                                                                                                                               |
| 2 | Yellow | 37 | SPC24**   | 9615.ENSCAFP00000025835 | SPC24, NDC80 kinetochore complex component, homolog (S. cerevisiae)<br>Cyclin-dependent kinase inhibitor 3; May play a role in cell cycle regulation. Dual specificity phosphatase active toward substrates containing either phosphotyrosine or phosphoserine residues                                                                                                                                                                                                               |
| 2 | Yellow | 37 | CDKN3     | 9615.ENSCAFP00000021952 |                                                                                                                                                                                                                                                                                                                                                                                                                                                                                       |
| 2 | Yellow | 37 | PLK1*     | 9615.ENSCAFP00000039127 | Polo-like kinase 1                                                                                                                                                                                                                                                                                                                                                                                                                                                                    |
| 2 | Yellow | 37 | CASC5**   | 9615.ENSCAFP00000013547 | Cancer susceptibility candidate 5                                                                                                                                                                                                                                                                                                                                                                                                                                                     |
| 2 | Yellow | 37 | UBE2C*    | 9615.ENSCAFP00000014322 | Ubiquitin-conjugating enzyme E2C                                                                                                                                                                                                                                                                                                                                                                                                                                                      |
| 2 | Yellow | 37 | NDC80*/** | 9615.ENSCAFP00000027183 | NDC80 kinetochore complex component homolog (S. cerevisiae)<br>Potential cell cycle regulator that may play a role in carcinogenesis of cancer cells. Mitotic phosphoprotein regulated by the ubiquitin-proteasome pathway. Also called HURP.                                                                                                                                                                                                                                         |
| 2 | Yellow | 37 | DLGAP5*   | 9615.ENSCAFP00000022150 |                                                                                                                                                                                                                                                                                                                                                                                                                                                                                       |
| 2 | Yellow | 37 | LRR1      | 9615.ENSCAFP00000020889 | Leucine rich repeat protein 1                                                                                                                                                                                                                                                                                                                                                                                                                                                         |
| 2 | Yellow | 37 | NUSAP1*   | 9615.ENSCAFP00000014023 | Nucleolar and spindle associated protein 1                                                                                                                                                                                                                                                                                                                                                                                                                                            |
| 2 | Yellow | 37 | CDK1      | 9615.ENSCAFP00000019027 | Cyclin-dependent kinase 1<br>non-SMC condensin I complex, subunit D2; Regulatory subunit of the condensin complex, a complex required for conversion of interphase chromatin into mitotic-like condense chromosomes. The condensin complex probably introduces positive supercoils into relaxed DNA in the presence of type I topoisomerases and converts nicked DNA into positive                                                                                                    |
| 3 | Green  | 21 | NCAPD2*** | 9615.ENSCAFP00000022300 |                                                                                                                                                                                                                                                                                                                                                                                                                                                                                       |

|   |        |    |            |                                                         |                                                                                                                                                                                                                                                                                                                                                                                                                                                                                                                                                                                                         |
|---|--------|----|------------|---------------------------------------------------------|---------------------------------------------------------------------------------------------------------------------------------------------------------------------------------------------------------------------------------------------------------------------------------------------------------------------------------------------------------------------------------------------------------------------------------------------------------------------------------------------------------------------------------------------------------------------------------------------------------|
|   |        |    |            | knotted forms in the presence of type II topoisomerases |                                                                                                                                                                                                                                                                                                                                                                                                                                                                                                                                                                                                         |
| 3 | Green  | 21 | ISG20      | 9615.ENSACFP00000016938                                 | Interferon stimulated exonuclease gene 20kDa                                                                                                                                                                                                                                                                                                                                                                                                                                                                                                                                                            |
|   | Green  | 21 | NCAPH***   | 9615.ENSACFP00000009828                                 | non-SMC condensin I complex, subunit H; Regulatory subunit of the condensin complex, a complex required for conversion of interphase chromatin into mitotic-like condense chromosomes                                                                                                                                                                                                                                                                                                                                                                                                                   |
| 3 | Green  | 21 | E2F1       | 9615.ENSACFP00000011055                                 | E2F transcription factor 1                                                                                                                                                                                                                                                                                                                                                                                                                                                                                                                                                                              |
| 3 | Green  | 21 | ENO2       | 9615.ENSACFP00000021430                                 | Enolase 2 (gamma, neuronal)                                                                                                                                                                                                                                                                                                                                                                                                                                                                                                                                                                             |
| 3 | Green  | 21 | PFKP       | 9615.ENSACFP00000008224                                 | Phosphofructokinase, platelet; Catalyzes the phosphorylation of D-fructose 6-phosphate to fructose 1,6-bisphosphate by ATP, the first committing step of glycolysis                                                                                                                                                                                                                                                                                                                                                                                                                                     |
| 3 | Green  | 21 | NCAPG*/*** | 9615.ENSACFP00000024530                                 | non-SMC condensin I complex, subunit G                                                                                                                                                                                                                                                                                                                                                                                                                                                                                                                                                                  |
| 3 | Green  | 21 | AK8        | 9615.ENSACFP00000029454                                 | Adenylate kinase 8                                                                                                                                                                                                                                                                                                                                                                                                                                                                                                                                                                                      |
| 3 | Green  | 21 | ACTR3B     | 9615.ENSACFP00000037793                                 | ARP3 actin-related protein 3 homolog B (yeast)                                                                                                                                                                                                                                                                                                                                                                                                                                                                                                                                                          |
|   |        |    |            |                                                         | DNA repair protein RAD51 homolog 1 ; Participates in a common DNA damage response pathway associated with the activation of homologous recombination and double-strand break repair. Binds to single and double-stranded DNA and exhibits DNA-dependent ATPase activity. Underwinds duplex DNA and forms helical nucleoprotein filaments. Part of a PALB2- scaffolded HR complex containing BRCA2 and RAD51C and which is thought to play a role in DNA repair by HR. Plays a role in regulating mitochondrial DNA copy number under conditions of oxidative stress in the presence of RAD51C and XRCC3 |
| 3 | Green  | 21 | RAD51      | 9615.ENSACFP00000013557                                 |                                                                                                                                                                                                                                                                                                                                                                                                                                                                                                                                                                                                         |
| 3 | Green  | 21 | PRPSAP2    | 9615.ENSACFP00000026958                                 | Phosphoribosyl pyrophosphate synthetase-associated protein 2                                                                                                                                                                                                                                                                                                                                                                                                                                                                                                                                            |
| 3 | Green  | 21 | DCP2       | 9615.ENSACFP00000037100                                 | DCP2 decapping enzyme homolog (S. cerevisiae)                                                                                                                                                                                                                                                                                                                                                                                                                                                                                                                                                           |
| 3 | Green  | 21 | KIAA0101   | 9615.ENSACFP00000040037                                 | also called PCLAF; PCNA-binding protein that acts as a regulator of DNA repair during DNA replication                                                                                                                                                                                                                                                                                                                                                                                                                                                                                                   |
| 3 | Green  | 21 | WRN        | 9615.ENSACFP00000032498                                 | Werner syndrome, RecQ helicase-like                                                                                                                                                                                                                                                                                                                                                                                                                                                                                                                                                                     |
| 3 | Green  | 21 | SPAG5**    | 9615.ENSACFP00000027622                                 | Sperm associated antigen 5; interacts with Ndc80 and CEP55                                                                                                                                                                                                                                                                                                                                                                                                                                                                                                                                              |
| 3 | Green  | 21 | ASPM**     | 9615.ENSACFP00000016776                                 | Abnormal spindle-like microcephaly-associated protein homolog ; Probable role in mitotic spindle regulation and coordination of mitotic processes. May have a preferential role in regulating neurogenesis.                                                                                                                                                                                                                                                                                                                                                                                             |
| 3 | Green  | 21 | TAP2       | 9615.ENSACFP00000001183                                 | ATP Binding Cassette Subfamily B Member; also called ABCB3                                                                                                                                                                                                                                                                                                                                                                                                                                                                                                                                              |
| 3 | Green  | 21 | KCNAB2     | 9615.ENSACFP00000028869                                 | Potassium voltage-gated channel, shaker-related subfamily, beta member 2                                                                                                                                                                                                                                                                                                                                                                                                                                                                                                                                |
| 3 | Green  | 21 | ESPL1*     | 9615.ENSACFP00000010445                                 | Extra spindle pole bodies homolog 1 (S. cerevisiae)                                                                                                                                                                                                                                                                                                                                                                                                                                                                                                                                                     |
| 3 | Green  | 21 | ACP5       | 9615.ENSACFP00000025519                                 | Acid phosphatase type 5; Uncharacterized protein                                                                                                                                                                                                                                                                                                                                                                                                                                                                                                                                                        |
| 3 | Green  | 21 | TOP2A      | 9615.ENSACFP00000042966                                 | Topoisomerase (DNA) II alpha 170kDa; Control of topological states of DNA by transient breakage and subsequent rejoining of DNA strands. Topoisomerase II makes double-strand breaks.                                                                                                                                                                                                                                                                                                                                                                                                                   |
| 4 | Marine | 16 | ARHGDIB    | 9615.ENSACFP00000018985                                 | Rho GDP dissociation inhibitor (GDI) beta                                                                                                                                                                                                                                                                                                                                                                                                                                                                                                                                                               |
| 4 | Marine | 16 | ARHGAP30   | 9615.ENSACFP00000018695                                 | Rho GTPase activating protein 30                                                                                                                                                                                                                                                                                                                                                                                                                                                                                                                                                                        |



|   |                |    |          |                         |                                                                                                                                                                                                                              |
|---|----------------|----|----------|-------------------------|------------------------------------------------------------------------------------------------------------------------------------------------------------------------------------------------------------------------------|
| 4 | Medium<br>Aqua | 16 | HMHA1    | 9615.ENSACFP00000031556 | Histocompatibility (minor) HA-1                                                                                                                                                                                              |
|   | Marine         |    |          |                         |                                                                                                                                                                                                                              |
|   | Medium         |    |          |                         |                                                                                                                                                                                                                              |
|   | Aqua           |    |          |                         |                                                                                                                                                                                                                              |
|   | Marine         | 16 | FGD3     | 9615.ENSACFP00000003318 | FYVE, RhoGEF and PH domain containing 3                                                                                                                                                                                      |
|   | Medium         |    |          |                         |                                                                                                                                                                                                                              |
|   | Aqua           |    |          |                         |                                                                                                                                                                                                                              |
| 4 | Marine         | 16 | ECT2     | 9615.ENSACFP00000037855 | Epithelial cell transforming sequence 2 oncogene                                                                                                                                                                             |
|   | Medium         |    |          |                         |                                                                                                                                                                                                                              |
|   | Aqua           |    |          |                         |                                                                                                                                                                                                                              |
| 4 | Marine         | 16 | ARHGAP15 | 9615.ENSACFP00000008184 | Rho GTPase activating protein 15                                                                                                                                                                                             |
|   | Medium         |    |          |                         |                                                                                                                                                                                                                              |
|   | Aqua           |    |          |                         |                                                                                                                                                                                                                              |
| 4 | Marine         | 16 | PREX1    | 9615.ENSACFP00000036141 | Phosphatidylinositol-3,4,5-trisphosphate-dependent Rac exchange factor 1                                                                                                                                                     |
|   | Medium         |    |          |                         |                                                                                                                                                                                                                              |
|   | Aqua           |    |          |                         |                                                                                                                                                                                                                              |
| 4 | Marine         | 16 | PRKCB    | 9615.ENSACFP00000025992 | Protein kinase C, beta                                                                                                                                                                                                       |
|   | Medium         |    |          |                         |                                                                                                                                                                                                                              |
|   | Aqua           |    |          |                         |                                                                                                                                                                                                                              |
| 4 | Marine         | 16 | GMIP     | 9615.ENSACFP00000020882 | GEM interacting protein                                                                                                                                                                                                      |
|   | Medium         |    |          |                         |                                                                                                                                                                                                                              |
|   | Aqua           |    |          |                         |                                                                                                                                                                                                                              |
| 4 | Marine         | 16 | ARHGAP9  | 9615.ENSACFP00000000325 | Rho GTPase activating protein 9                                                                                                                                                                                              |
|   | Medium         |    |          |                         |                                                                                                                                                                                                                              |
|   | Aqua           |    |          |                         |                                                                                                                                                                                                                              |
| 4 | Marine         | 16 | MX2      | 9615.ENSACFP00000014935 | Interferon-induced GTP-binding protein Mx2 ; Interferon-induced dynamin-like GTPase with antiviral activity against vesicular stomatitis virus (VSV)                                                                         |
|   | Medium         |    |          |                         |                                                                                                                                                                                                                              |
|   | Aqua           |    |          |                         |                                                                                                                                                                                                                              |
| 4 | Marine         | 16 | PSD4     | 9615.ENSACFP00000010829 | Pleckstrin and Sec7 domain containing 4                                                                                                                                                                                      |
|   | Medium         |    |          |                         |                                                                                                                                                                                                                              |
|   | Aqua           |    |          |                         |                                                                                                                                                                                                                              |
| 4 | Marine         | 16 | RACGAP1  | 9615.ENSACFP00000012284 | Rac GTPase activating protein 1                                                                                                                                                                                              |
|   | Medium         |    |          |                         |                                                                                                                                                                                                                              |
|   | Aqua           |    |          |                         |                                                                                                                                                                                                                              |
| 4 | Marine         | 16 | TAGAP    | 9615.ENSACFP00000038236 | T-cell activation RhoGTPase activating protein                                                                                                                                                                               |
|   | Medium         |    |          |                         |                                                                                                                                                                                                                              |
|   | Aqua           |    |          |                         |                                                                                                                                                                                                                              |
| 4 | Marine         | 16 | RHOH     | 9615.ENSACFP00000023421 | Ras homolog family member H                                                                                                                                                                                                  |
|   | Medium         |    |          |                         |                                                                                                                                                                                                                              |
|   | Aqua           |    |          |                         |                                                                                                                                                                                                                              |
| 4 | Marine         | 16 | FAM13B   | 9615.ENSACFP00000001644 | Family with sequence similarity 13, member B                                                                                                                                                                                 |
|   |                |    |          |                         | Cytochrome b-245, alpha polypeptide ; Critical component of the membrane-bound oxidase of phagocytes that generates superoxide. Associates with NOX3 to form a functional NADPH oxidase constitutively generating superoxide |
| 5 | Dark           | 16 | CYBA     | 9615.ENSACFP00000029449 |                                                                                                                                                                                                                              |
|   | Cyan           |    |          |                         |                                                                                                                                                                                                                              |
| 5 | Dark           | 16 | FGR      | 9615.ENSACFP00000017792 | Gardner-Rasheed feline sarcoma viral (v-fgr) oncogene homolog                                                                                                                                                                |
|   | Cyan           |    |          |                         |                                                                                                                                                                                                                              |
| 5 | Dark           | 16 | CD3D     | 9615.ENSACFP00000038117 | CD3d molecule, delta (CD3-TCR complex)                                                                                                                                                                                       |
|   | Cyan           |    |          |                         |                                                                                                                                                                                                                              |

|   |              |    |         |                         |                                                                                                                                                                                                                                                                                                                                                                                                                                                                                                                             |
|---|--------------|----|---------|-------------------------|-----------------------------------------------------------------------------------------------------------------------------------------------------------------------------------------------------------------------------------------------------------------------------------------------------------------------------------------------------------------------------------------------------------------------------------------------------------------------------------------------------------------------------|
| 5 | Dark<br>Cyan | 16 | ITGAL   | 9615.ENSCAFP00000024419 | Integrin, alpha L (antigen CD11A (p180), lymphocyte function-associated antigen 1; alpha polypeptide)                                                                                                                                                                                                                                                                                                                                                                                                                       |
| 5 | Dark<br>Cyan | 16 | PTPN6   | 9615.ENSCAFP00000021345 | Protein tyrosine phosphatase, non-receptor type 6                                                                                                                                                                                                                                                                                                                                                                                                                                                                           |
| 5 | Dark<br>Cyan | 16 | NCF4    | 9615.ENSCAFP00000002195 | Neutrophil cytosolic factor 4, 40kDa                                                                                                                                                                                                                                                                                                                                                                                                                                                                                        |
| 5 | Dark<br>Cyan | 16 | DAPP1   | 9615.ENSCAFP00000015548 | Dual adaptor of phosphotyrosine and 3-phosphoinositides                                                                                                                                                                                                                                                                                                                                                                                                                                                                     |
| 5 | Dark<br>Cyan | 16 | NCKAP1L | 9615.ENSCAFP00000009656 | NCK-associated protein 1-like                                                                                                                                                                                                                                                                                                                                                                                                                                                                                               |
| 5 | Dark<br>Cyan | 16 | ITGB2   | 9615.ENSCAFP00000016262 | Integrin beta                                                                                                                                                                                                                                                                                                                                                                                                                                                                                                               |
| 5 | Dark<br>Cyan | 16 | CD80    | 9615.ENSCAFP00000016197 | T-lymphocyte activation antigen CD80 precursor                                                                                                                                                                                                                                                                                                                                                                                                                                                                              |
| 5 | Dark<br>Cyan | 16 | CD86    | 9615.ENSCAFP00000017296 | T-lymphocyte activation antigen CD86 precursor                                                                                                                                                                                                                                                                                                                                                                                                                                                                              |
| 5 | Dark<br>Cyan | 16 | PIK3CD  | 9615.ENSCAFP00000029210 | Phosphatidylinositol-4,5-bisphosphate 3-kinase, catalytic subunit delta                                                                                                                                                                                                                                                                                                                                                                                                                                                     |
| 5 | Dark<br>Cyan | 16 | CYFIP2  | 9615.ENSCAFP00000025820 | Cytoplasmic FMR1 interacting protein 2                                                                                                                                                                                                                                                                                                                                                                                                                                                                                      |
| 5 | Dark<br>Cyan | 16 | CYBB    | 9615.ENSCAFP00000020532 | Cytochrome b-245, beta polypeptide                                                                                                                                                                                                                                                                                                                                                                                                                                                                                          |
| 5 | Dark<br>Cyan | 16 | DLA-64  | 9615.ENSCAFP00000031410 | MHC class I DLA-64 precursor ; Involved in the presentation of foreign antigens to the immune system                                                                                                                                                                                                                                                                                                                                                                                                                        |
| 5 | Cyan         | 16 | VAV1    | 9615.ENSCAFP00000027443 | Vav 1 guanine nucleotide exchange factor                                                                                                                                                                                                                                                                                                                                                                                                                                                                                    |
| 6 | Purple       | 8  | MCM5    | 9615.ENSCAFP00000002480 | Minichromosome maintenance complex component 5<br>Flap structure-specific endonuclease 1; Structure-specific nuclease with 5'-flap endonuclease and 5'-3' exonuclease activities involved in DNA replication and repair. During DNA replication, cleaves the 5'-overhanging flap structure that is generated by displacement synthesis when DNA polymerase encounters the 5'-end of a downstream Okazaki fragment. It enters the flap from the 5'-end and then tracks to cleave the flap base, leaving a nick for ligation. |
| 6 | Purple       | 8  | FEN1    | 9615.ENSCAFP00000043067 |                                                                                                                                                                                                                                                                                                                                                                                                                                                                                                                             |
| 6 | Purple       | 8  | RAD18   | 9615.ENSCAFP00000008290 | RAD18 homolog (S. cerevisiae)                                                                                                                                                                                                                                                                                                                                                                                                                                                                                               |
|   | Purple       | 8  | KIF4A*  | 9615.ENSCAFP00000024762 | Uncharacterized protein                                                                                                                                                                                                                                                                                                                                                                                                                                                                                                     |
| 6 | Purple       | 8  | MCM6    | 9615.ENSCAFP00000007692 | Minichromosome maintenance complex component 6                                                                                                                                                                                                                                                                                                                                                                                                                                                                              |
| 6 | Purple       | 8  | MCM10   | 9615.ENSCAFP00000007092 | Minichromosome maintenance complex component 10                                                                                                                                                                                                                                                                                                                                                                                                                                                                             |
| 6 | Purple       | 8  | KIF23*  | 9615.ENSCAFP00000025844 | Kinesin family member 23                                                                                                                                                                                                                                                                                                                                                                                                                                                                                                    |
| 6 | Purple       | 8  | GIN54   | 9615.ENSCAFP00000008567 | GIN5 complex subunit 4 (Sl5d homolog); The GINS complex plays an essential role in the initiation of DNA replication                                                                                                                                                                                                                                                                                                                                                                                                        |

\* APC substrates

\*\* Kinetochore and Spindle Assembly Checkpoint associated proteins

\*\*\* Components of the chromosome condensin complex

## Supplemental Table S5

Canine 4 tumor up 3 FC:remission down 2 FC:no remission up 3 FC (27 genes)

|       |            |                                                                                                                                                                                                                                                                                                                                                                                                                                                                                                                                                                                                                         |
|-------|------------|-------------------------------------------------------------------------------------------------------------------------------------------------------------------------------------------------------------------------------------------------------------------------------------------------------------------------------------------------------------------------------------------------------------------------------------------------------------------------------------------------------------------------------------------------------------------------------------------------------------------------|
| Red   | CKAP2L*/** | Cytoskeleton associated protein 2-like                                                                                                                                                                                                                                                                                                                                                                                                                                                                                                                                                                                  |
| Red   | CDC20*     | Cell division cycle 20 homolog (S. cerevisiae)                                                                                                                                                                                                                                                                                                                                                                                                                                                                                                                                                                          |
| Red   | NEK2*/**   | NIMA-related kinase 2                                                                                                                                                                                                                                                                                                                                                                                                                                                                                                                                                                                                   |
| Red   | PTTG1*     | Pituitary tumor-transforming 1                                                                                                                                                                                                                                                                                                                                                                                                                                                                                                                                                                                          |
| Red   | ECT2       | Epithelial cell transforming sequence 2 oncogene                                                                                                                                                                                                                                                                                                                                                                                                                                                                                                                                                                        |
| Red   | CCNB2*     | Cyclin B2                                                                                                                                                                                                                                                                                                                                                                                                                                                                                                                                                                                                               |
| Red   | NUF2**     | NUF2, NDC80 kinetochore complex component, homolog (S. cerevisiae)                                                                                                                                                                                                                                                                                                                                                                                                                                                                                                                                                      |
| Red   | UBE2C*     | Ubiquitin-conjugating enzyme E2C                                                                                                                                                                                                                                                                                                                                                                                                                                                                                                                                                                                        |
| Red   | DLGAP5*    | Discs, large (Drosophila) homolog-associated protein 5                                                                                                                                                                                                                                                                                                                                                                                                                                                                                                                                                                  |
| Red   | CDCA3*     | F-box-like protein which is required for entry into mitosis                                                                                                                                                                                                                                                                                                                                                                                                                                                                                                                                                             |
| Red   | CCNA2*     | Cyclin A2                                                                                                                                                                                                                                                                                                                                                                                                                                                                                                                                                                                                               |
| Green | C4BPA      | Complement component 4 binding protein, alpha                                                                                                                                                                                                                                                                                                                                                                                                                                                                                                                                                                           |
| Green | CXCL10     | C-X-C motif chemokine 10 ; Chemotactic for monocytes and T-lymphocytes. Binds to CXCR3 (By similarity)                                                                                                                                                                                                                                                                                                                                                                                                                                                                                                                  |
| Green | MCM5       | Minichromosome maintenance complex component 5                                                                                                                                                                                                                                                                                                                                                                                                                                                                                                                                                                          |
| Green | KIF15*?    | Kinesin family member 15                                                                                                                                                                                                                                                                                                                                                                                                                                                                                                                                                                                                |
|       |            | Apolipoprotein C-I Truncated apolipoprotein C-I; Inhibitor of lipoprotein binding to the low density lipoprotein (LDL) receptor, LDL receptor-related protein, and very low density lipoprotein (VLDL) receptor. Associates with high density lipoproteins (HDL) and the triacylglycerol-rich lipoproteins in the plasma and makes up about 10% of the protein of the VLDL and 2% of that of HDL. Appears to interfere directly with fatty acid uptake and is also the major plasma inhibitor of cholesteryl ester transfer protein (CETP). Binds free fatty acids and reduces their intracellular esterification [...] |
| Green | APOC1      |                                                                                                                                                                                                                                                                                                                                                                                                                                                                                                                                                                                                                         |
| Green | MIS18A**   | MIS18 kinetochore protein homolog A (S. pombe)                                                                                                                                                                                                                                                                                                                                                                                                                                                                                                                                                                          |
| Green | HIST1H1A   | Histone cluster 1, H1a                                                                                                                                                                                                                                                                                                                                                                                                                                                                                                                                                                                                  |
| Green | MCM10      | Minichromosome maintenance complex component 10                                                                                                                                                                                                                                                                                                                                                                                                                                                                                                                                                                         |
| Green | CD70       | CD70 molecule                                                                                                                                                                                                                                                                                                                                                                                                                                                                                                                                                                                                           |
| Dark  |            |                                                                                                                                                                                                                                                                                                                                                                                                                                                                                                                                                                                                                         |
| Cyan  | SPAG5**    | Sperm associated antigen 5                                                                                                                                                                                                                                                                                                                                                                                                                                                                                                                                                                                              |
| Dark  |            |                                                                                                                                                                                                                                                                                                                                                                                                                                                                                                                                                                                                                         |
| Cyan  | HIST1H2AC  | Histone cluster 1, H2ac                                                                                                                                                                                                                                                                                                                                                                                                                                                                                                                                                                                                 |
| Dark  |            |                                                                                                                                                                                                                                                                                                                                                                                                                                                                                                                                                                                                                         |
| Cyan  | TOP2A      | Topoisomerase (DNA) II alpha 170kDa; Control of topological states of DNA by transient breakage and subsequent rejoining of DNA strands. Topoisomerase II makes double-strand breaks                                                                                                                                                                                                                                                                                                                                                                                                                                    |
|       |            | DNA repair protein RAD51 homolog 1 ; Participates in a common DNA damage response pathway associated with the activation of homologous recombination and double-strand break repair. Binds to single and double-stranded DNA and exhibits DNA-dependent ATPase activity. Underwinds duplex DNA and forms helical nucleoprotein filaments. Part of a PALB2- scaffolded HR complex containing BRCA2 and RAD51C and which is thought to play a role in DNA repair by HR. Plays a role in regulating mitochondrial DNA copy number under conditions of oxidative stress in the presence of RAD51C and XRCC3                 |
| Dark  |            |                                                                                                                                                                                                                                                                                                                                                                                                                                                                                                                                                                                                                         |
| Cyan  | RAD51      |                                                                                                                                                                                                                                                                                                                                                                                                                                                                                                                                                                                                                         |
| Dark  |            |                                                                                                                                                                                                                                                                                                                                                                                                                                                                                                                                                                                                                         |
| Cyan  | NCAPG*/*** | non-SMC condensin I complex, subunit G                                                                                                                                                                                                                                                                                                                                                                                                                                                                                                                                                                                  |

\* APC substrates

\*\* Kinetochore and Spindle Assembly Checkpoint associated proteins

\*\*\* Components of the chromosome condensin complex
